# Supplementary material for: The Handbook of Minerals on a Gluten-Free Diet
Source: PubMed Central journal article supplement (PMC6266778; doi:10.3390/nu10111683), 2018-11-05
Supplement: nutrients-10-01683-s001.pdf [file nutrients-10-01683-s001.pdf]

**Table S1.** Calcium in gluten-free I – flours, II – mixes for cooking, III – bakery products, IV – cereals and flakes, V – groats and rice, VI – pasta.

|   | PRODUCT                     | PRODUCER/INGREDIENTS/OTHER INFORMATION | MG 100 G                  | MG PORTION               | RNI PORTION           | REFERENCE  |
|---|-----------------------------|----------------------------------------|---------------------------|--------------------------|-----------------------|------------|
| I | Pantry                      | The Gluten-Free Pantry, Inc            | 500                       | 150                      | 19                    | [1]        |
|   | Amaranth Flour              |                                        | 207 (94–345) <sup>1</sup> | 62 (28–104) <sup>1</sup> | 8 (4–13) <sup>1</sup> | [2–5]      |
|   | Measure for Measure Flour   | The King Arthur Flour Company, Inc.    | 194                       | 58                       | 7                     | [1]        |
|   | Acorn Flour                 |                                        | 164                       | 49                       | 6                     | [5]        |
|   | Amaranth Flour Roasted      |                                        | 150                       | 45                       | 6                     | [3]        |
|   | Teff Flour                  |                                        | 139 (84–180) <sup>1</sup> | 42 (25–54) <sup>1</sup>  | 5 (3–7) <sup>1</sup>  | [3,5–7]    |
|   | Chickpea Flour              |                                        | 92                        | 28                       | 3                     | [5]        |
|   | Whole Grain Bread Flour     | Sorghum, Teff, Millet, Rice            | 67                        | 20                       | 3                     | [1]        |
|   | Chestnut Flour              |                                        | 58                        | 17                       | 2                     | [5]        |
|   | Quinoa Flour                |                                        | 34 (18–50) <sup>1</sup>   | 10 (5–15) <sup>1</sup>   | 2 (1–2) <sup>1</sup>  | [6–8]      |
|   | Oat Flour                   |                                        | 31 (22–40) <sup>1</sup>   | 10 (7–12) <sup>1</sup>   | 2 (1–2) <sup>1</sup>  | [5–7]      |
|   | Flour                       | Jyttemel Original                      | 37                        | 11                       | 1                     | [9]        |
|   | Flour, Coarse               | Semper                                 | 34                        | 10                       | 1                     | [9]        |
|   | Flour                       |                                        | 32                        | 10                       | 1                     | [10]       |
|   | Sprouted Yellow Cornmeal    | To Your Health Sprouted Flour Co.      | 30                        | 9                        | 1                     | [1]        |
|   | Flour With 10% Of Oat Flour | Corn, Potato, Oat                      | 26                        | 8                        | 1                     | [5]        |
|   | Mixed Flours                |                                        | 26                        | 8                        | 1                     | [11]       |
|   | Buckwheat Flour             |                                        | 22 (11–40) <sup>1</sup>   | 6 (3–12) <sup>1</sup>    | 1 (0–2) <sup>1</sup>  | [3,5–7]    |
|   | Flour, Mix                  | Rice, Soya, Corn, Tapioca              | 20                        | 6                        | 1                     | [12]       |
|   | Millet Flour                |                                        | 14 (13–14) <sup>1</sup>   | 4 (4) <sup>1</sup>       | 1 (0–1) <sup>1</sup>  | [3,5]      |
|   | Flour                       | Schär                                  | 12                        | 4                        | 0                     | [9]        |
|   | Corn Starch                 |                                        | 11                        | 3                        | 0                     | [3]        |
|   | Sorghum Flour               |                                        | 10                        | 3                        | 0                     | [6,7]      |
|   | Brown Rice Flour            |                                        | 10                        | 3                        | 0                     | [13]       |
|   | Rice Flour                  |                                        | 6 (0–10) <sup>1</sup>     | 2 (0–3) <sup>1</sup>     | 0 (0) <sup>1</sup>    | [3,5–7,13] |

|           |                                               |                                      |                      |                      |                    |            |
|-----------|-----------------------------------------------|--------------------------------------|----------------------|----------------------|--------------------|------------|
|           | Rice Starch                                   |                                      | 5                    | 2                    | 0                  | [3]        |
|           | Corn Flour                                    |                                      | 3 (0-7) <sup>1</sup> | 1 (0-2) <sup>1</sup> | 0 (0) <sup>1</sup> | [3,5-7,13] |
|           | No Data For 20 Flours                         |                                      |                      |                      |                    |            |
| <b>II</b> | Cornbread Mix                                 | The King Arthur Flour Company, Inc.  | 513                  | 154                  | 19                 | [1]        |
|           | Baking Mix White                              | Glutafin                             | 400                  | 120                  | 15                 | [14]       |
|           | Baking Mix Brown                              | Glutafin                             | 400                  | 120                  | 15                 | [14]       |
|           | All Purpose Baking Mix                        | New Hope Mills Manufacturing, Inc.   | 250                  | 75                   | 9                  | [1]        |
|           | Premium Biscuit Mix                           | Duinkerken Foods Inc.                | 250                  | 75                   | 9                  | [1]        |
|           | Southern Glory, Biscuits Baking Mix           | 1-2-3 Gluten Free, Inc.              | 194                  | 58                   | 7                  | [1]        |
|           | Pancake Mix                                   | Bob's Red Mill Natural Foods, Inc.   | 190                  | 57                   | 7                  | [1]        |
|           | Pancake Mix                                   | Rice, Tapioca, Corn                  | 162                  | 49                   | 6                  | [1]        |
|           | Muffin Mix                                    | New Hope Mills Manufacturing, Inc.   | 158                  | 47                   | 6                  | [1]        |
|           | Bisquick Baking Mix Pancake & Waffle Mix      | General Mills Sales Inc.             | 158                  | 47                   | 6                  | [1]        |
|           | Vanilla Cupcake Mix                           | New Hope Mills Manufacturing, Inc.   | 121                  | 36                   | 5                  | [1]        |
|           | Pancake + Baking Mix                          | Schnuck Markets, Inc.                | 100                  | 30                   | 4                  | [1]        |
|           | Bake Mix (Pizza)                              |                                      | 89                   | 27                   | 3                  | [10]       |
|           | Betty Crocker Yellow Cake Mix                 | General Mills Sales Inc.             | 85                   | 26                   | 3                  | [1]        |
|           | Fudge Brownie Mi                              | Arrowhead Mills                      | 80                   | 24                   | 3                  | [1]        |
|           | Cookie Mix, Chocolate Chip                    | Aldi-Benner Company, LiveGFree       | 74                   | 22                   | 3                  | [1]        |
|           | Blueberry Muffin Mix                          | Continental Mills, Inc.              | 61                   | 18                   | 2                  | [1]        |
|           | Favorite Sandwich Bread Mix                   | The Gluten-Free Pantry, Inc. Glutino | 60                   | 18                   | 2                  | [1]        |
|           | Fluffy Pancake Mix                            | The Gluten-Free Pantry, Inc. Glutino | 57                   | 17                   | 2                  | [1]        |
|           | Bread Mix                                     | Bob's Red Mill Natural Foods, Inc.   | 57                   | 17                   | 2                  | [1]        |
|           | Bake Mix White (Cake)                         |                                      | 55                   | 16                   | 2                  | [10]       |
|           | Wheat-Free Baking Mix, Classic Chocolate Cake | Schnuck Markets, Inc.                | 57                   | 17                   | 2                  | [1]        |
|           | Cake Base, Powder                             | Toro                                 | 53                   | 16                   | 2                  | [9]        |
|           | Cake Mix                                      | Cup4cup, Llc                         | 50                   | 15                   | 2                  | [1]        |

|            |                                   |                                                      |     |     |    |      |
|------------|-----------------------------------|------------------------------------------------------|-----|-----|----|------|
|            | Yellow Cake Mix                   | Cup4cup, Llc                                         | 50  | 15  | 2  | [1]  |
|            | Yellow Cake Mix                   | Aldi-Benner Company LiveGFree                        | 47  | 14  | 2  | [1]  |
|            | Flour for Bread                   |                                                      | 45  | 14  | 2  | [11] |
|            | Chocolate Cake Mix                | The King Arthur Flour Company, Inc.                  | 44  | 13  | 2  | [1]  |
|            | Muffin Mix                        | Cup4cup, Llc                                         | 41  | 12  | 2  | [1]  |
|            | Oat Mix For Bread                 | Oat (61%), Potato                                    | 40  | 12  | 2  | [5]  |
|            | Cookie Mix                        | Bob's Red Mill Natural Foods, Inc.                   | 38  | 11  | 1  | [1]  |
|            | Brownie Mix with Fudge Frosting   | Tapioca, Potato                                      | 36  | 11  | 1  | [1]  |
|            | Multigrain Mix For Bread          | Corn, Rice, Linseed Flour (6%), Sunflower Seeds (6%) | 33  | 10  | 1  | [5]  |
|            | Breadcrumbs                       |                                                      | 32  | 10  | 1  | [10] |
|            | Oat Cookies Mix                   | Oat (45%), Rice, Corn                                | 29  | 9   | 1  | [5]  |
|            | Oat Mix for Chocolate Muffins     | Oat (20%), Potato, Rice                              | 25  | 8   | 1  | [5]  |
|            | Lemon Pound Cake Mix              | Brandless                                            | 25  | 8   | 1  | [1]  |
|            | Stuffing Mix                      | Marie Antoinette's Gluten Free Bake Shoppe           | 20  | 6   | 1  | [1]  |
|            | Muffin Mix                        | Corn, Buckwheat                                      | 20  | 6   | 1  | [5]  |
|            | Bake Mix Brown (Cake)             |                                                      | 18  | 5   | 1  | [10] |
|            | Bread Mix                         | Corn, GF Wheat                                       | 17  | 5   | 1  | [5]  |
|            | Flour Mix For Bread               |                                                      | 17  | 5   | 1  | [15] |
|            | Cake Flour Mix                    |                                                      | 16  | 5   | 1  | [15] |
|            | Breadcrumbs                       |                                                      | 15  | 5   | 1  | [11] |
|            | Cake Mix, Powder                  | Toro                                                 | 10  | 3   | 0  | [9]  |
|            | Flour for Cake                    |                                                      | 7   | 2   | 0  | [11] |
|            | Baking Mix White                  | Schar                                                | 4   | 1   | 0  | [14] |
|            | Flour Mix                         |                                                      | 3   | 1   | 0  | [15] |
|            | No Data For 30 Products           |                                                      |     |     |    |      |
| <b>III</b> | Crisp Bread, Prepared from Powder | Toro                                                 | 282 | 282 | 35 | [9]  |
|            | Bread White                       | Glutafin                                             | 236 | 236 | 30 | [14] |
|            | Bread Brown                       | Glutafin                                             | 231 | 231 | 29 | [14] |

|                                      |                                                                                                                        |     |     |    |      |
|--------------------------------------|------------------------------------------------------------------------------------------------------------------------|-----|-----|----|------|
| Original Sandwich Bread              | Rudi's Bakery                                                                                                          | 180 | 180 | 23 | [1]  |
| Classic White Rolls                  | Dr. Schar Usa, Inc.                                                                                                    | 180 | 180 | 23 | [1]  |
| Omega Flax Bread                     | Silver Hills                                                                                                           | 171 | 171 | 21 | [1]  |
| Brown Bread                          | Rice, Corn, Potato                                                                                                     | 166 | 166 | 21 | [5]  |
| Rice Bread With Milk                 | Rice Flour, Potato Starch, Corn Starch, Milk Powder                                                                    | 147 | 147 | 18 | [16] |
| Buckwheat Bread With Milk            | Buckwheat Flour, Potato Starch, Corn Starch, Milk Powder                                                               | 142 | 142 | 18 | [16] |
| Crispbread                           |                                                                                                                        | 142 | 142 | 18 | [15] |
| Rolls                                | White, Made with Rice Flour, Rice Starch, And Corn Starch                                                              | 140 | 140 | 18 | [1]  |
| Bread White                          | Made with Rice Flour, Corn Starch, and/Or Tapioca                                                                      | 138 | 138 | 17 | [1]  |
| Rice Bread with Milk and Seeds       | Rice Flour, Potato Starch, Corn Starch, Milk Powder, Seeds (Poppy, Amaranth, Flax, Sunflower, Pumpkin, Hazelnuts)      | 136 | 136 | 17 | [16] |
| Buckwheat Bread with Milk and Seeds  | Buckhweta Flour, Potato Starch, Corn Starch, Milk Powder, Seeds (Poppy, Amaranth, Flax, Sunflower, Pumpkin, Hazelnuts) | 136 | 136 | 17 | [16] |
| Sandwich Bread, Whit                 | Gluten Free Nation                                                                                                     | 135 | 135 | 17 | [1]  |
| Seed Crispbread                      | Water, Buckwheat Flour, Sunflower Seed, Pumpkin Seed, Sesame Seed, Rapeseed Oil, Linseed, Salt                         | 134 | 134 | 17 | [17] |
| Swiss Roll,                          | Egg Without Shell, Sugar, Corn Flour, Potato Starch, Baking Powder, Mixed Berry Jam                                    | 132 | 132 | 17 | [17] |
| Lye Pretzel                          |                                                                                                                        | 124 | 124 | 16 | [10] |
| Whole Grain Dinner Rolls             | Udi's Gluten Free                                                                                                      | 118 | 118 | 15 | [1]  |
| Rolls, Whole Grain,                  | Tapioca Starch, Brown Rice Flour                                                                                       | 118 | 118 | 15 | [1]  |
| Seeds & Grains Bread                 | Glencourt Inc.                                                                                                         | 105 | 105 | 13 | [1]  |
| Seeded Whole Grain Dinner Rolls      | Pinnacle Foods Group Llc, Udi's Gluten Free                                                                            | 100 | 100 | 13 | [1]  |
| Wholegrain Bread                     |                                                                                                                        | 96  | 96  | 12 | [10] |
| Sprouted for Life, Almond Bread      | Food for Life Baking Co Inc                                                                                            | 93  | 93  | 12 | [1]  |
| Flax Bread                           | Food for Life Baking Co Inc                                                                                            | 93  | 93  | 12 | [1]  |
| 3 Seed Bread                         | Food for Life Baking Co Inc                                                                                            | 93  | 93  | 1  | [1]  |
| Baguette Gourmet Garlic Bread & Subs | Dr. Schar Usa, Inc.                                                                                                    | 91  | 91  | 11 | [1]  |

|                                                                   |                                                 |                         |                         |                       |            |
|-------------------------------------------------------------------|-------------------------------------------------|-------------------------|-------------------------|-----------------------|------------|
| Classic French Dinner Rolls                                       | Udi's Gluten Free                               | 82                      | 82                      | 10                    | [1]        |
| Rolls                                                             | Brown Rice Flour, Tapioca Starch, Potato Starch | 82                      | 82                      | 10                    | [1]        |
| Sesame Bagels                                                     | Katz Gluten Free                                | 72                      | 72                      | 9                     | [18]       |
| Sprouted Seeds Bread                                              | Grindstone Bakery                               | 70                      | 70                      | 9                     | [1]        |
| Ancient Grains Bread                                              | Coborn's Gluten Free Bakery                     | 67                      | 67                      | 8                     | [18]       |
| Bread with Oilseeds                                               |                                                 | 67                      | 67                      | 8                     | [15]       |
| White Bread with Carob Bean Gum                                   |                                                 | 62                      | 62                      | 8                     | [15]       |
| Rustic Multigrain Dinner Roll Mix, Seeds & Grains                 | Bella Gluten-Free Llc                           | 61                      | 61                      | 8                     | [1]        |
| Bread, Cinnamon-Raisin                                            | The Essential Baking Company, Inc.              | 61                      | 61                      | 8                     | [1]        |
| Bread, Whole Grain, Made with Tapioca Starch and Brown Rice Flour |                                                 | 60                      | 60                      | 8                     | [1]        |
| Soft & Hearty Whole Grain Bread                                   | Pinnacle Foods Group Llc, Udi's Gluten Free     | 60                      | 60                      | 8                     | [1]        |
| Bread, With Added Grains, Commercial                              |                                                 | 60                      | 60                      | 8                     | [12]       |
| Bread                                                             | Tapioca Starch, Brown Rice Flour                | 59                      | 59                      | 7                     | [1]        |
| Raisin Bread                                                      |                                                 | 59                      | 59                      | 7                     | [10]       |
| Classic French Dinner Rolls                                       | Pinnacle Foods Group Llc, Udi's Gluten Free     | 57                      | 57                      | 7                     | [1]        |
| White Bread                                                       | The Kroger Co.                                  | 56                      | 56                      | 7                     | [1]        |
| 7 Grain Bread                                                     | The Kroger Co.                                  | 56                      | 56                      | 7                     | [1]        |
| Bread, Homemade from Basic Ingredients                            |                                                 | 55                      | 55                      | 7                     | [12]       |
| Crisp Bread                                                       |                                                 | 53 (6-143) <sup>1</sup> | 53 (6-143) <sup>1</sup> | 7 (1-18) <sup>1</sup> | [10,11,15] |
| Bread                                                             | GF Wheat, Millet Flour; Corn Starch             | 52                      | 52                      | 7                     | [19]       |
| Piadina                                                           |                                                 | 52                      | 52                      | 7                     | [11]       |
| White Sandwich Bread                                              | Pinnacle Foods Group Llc, Udi's Gluten Free     | 51                      | 51                      | 6                     | [1]        |
| Bread, Commercial                                                 |                                                 | 50                      | 50                      | 6                     | [12]       |
| Soft & Hearty Whole Grain Bread                                   | Udi's Gluten Free                               | 48                      | 48                      | 6                     | [18]       |
| Wholesome Bread                                                   | Katz Gluten Free                                | 46                      | 46                      | 6                     | [18]       |
| Bagels, Poppy Seed                                                | Katz Gluten Free                                | 43                      | 43                      | 5                     | [18]       |
| Wheat-Free, Classic White Bread                                   | Andrea's Gluten Free                            | 41                      | 41                      | 5                     | [1]        |

|                                                                     |                                                  |    |    |   |      |
|---------------------------------------------------------------------|--------------------------------------------------|----|----|---|------|
| Rolls                                                               | Brown Rice Flour, Tapioca Starch, Sorghum Flour  | 41 | 41 | 5 | [1]  |
| Soft & Sweet Cinnamon & Raisin Bread                                | Pinnacle Foods Group Llc, Udi's Gluten Free      | 41 | 41 | 5 | [1]  |
| Bread, Flax, Vegan                                                  | The Gluten Free Bakery                           | 40 | 40 | 5 | [18] |
| Millet Bread                                                        |                                                  | 35 | 35 | 4 | [15] |
| Toast                                                               |                                                  | 34 | 34 | 4 | [10] |
| Shortbread                                                          |                                                  | 33 | 33 | 4 | [10] |
| Crispy & Delicious French Baguettes                                 | Pinnacle Foods Group Llc<br>Udi's Gluten Free    | 33 | 33 | 4 | [1]  |
| Artisan Baker White Bread                                           | Dr. Schar Usa, Inc.                              | 32 | 32 | 4 | [1]  |
| Scone                                                               |                                                  | 31 | 31 | 4 | [10] |
| Raisin Bread                                                        |                                                  | 29 | 29 | 4 | [15] |
| Bread                                                               | Semper                                           | 28 | 28 | 4 | [9]  |
| Corn Dogs                                                           | Foster Poultry Farms                             | 27 | 27 | 3 | [1]  |
| Off & Chewy Bagels, Cinnamon Raisin                                 | Pinnacle Foods Group Llc, Udi's Gluten Free      | 25 | 25 | 3 | [1]  |
| Soft Dinner Roll                                                    | Rudi's Bakery                                    | 24 | 24 | 3 | [1]  |
| Bread, White, Made with Potato Extract, Rice Starch, And Rice Flour |                                                  | 24 | 24 | 3 | [1]  |
| Bread Crumbs                                                        |                                                  | 20 | 20 | 3 | [15] |
| White Bread                                                         |                                                  | 20 | 20 | 3 | [15] |
| Bread                                                               | Corn, GF Wheat                                   | 19 | 19 | 2 | [5]  |
| Buckwheat Bread                                                     | Buckwheat Flour, Potato Starch, Corn Starch      | 19 | 19 | 2 | [16] |
| Bakehouse, Hamburger Buns                                           | Harry's Farmers Market, Ltd., Whole Foods Market | 18 | 18 | 2 | [1]  |
| Bun                                                                 |                                                  | 18 | 18 | 2 | [10] |
| Ciabatta                                                            |                                                  | 17 | 17 | 2 | [10] |
| Soft & Delicious White Sandwich Bread                               | Pinnacle Foods Group Llc, Udi's Gluten Free      | 17 | 17 | 2 | [1]  |
| Chestnut Bread                                                      |                                                  | 16 | 16 | 2 | [15] |
| Rice Bread                                                          | Rice Flour, Potato Starch, Corn Starch           | 15 | 15 | 2 | [16] |
| Soft & Hearty Whole Grain Bread                                     | Pinnacle Foods Group Llc, Udi's Gluten Free      | 15 | 15 | 2 | [1]  |
| Bagels, Plain                                                       | Katz Gluten Free                                 | 14 | 14 | 2 | [18] |

|           |                               |                                                                 |     |     |    |      |
|-----------|-------------------------------|-----------------------------------------------------------------|-----|-----|----|------|
|           | Wholemeal Bread               |                                                                 | 14  | 14  | 2  | [11] |
|           | Baquette                      |                                                                 | 14  | 14  | 2  | [10] |
|           | Melba Toast                   |                                                                 | 13  | 13  | 2  | [11] |
|           | Rustic Bread                  |                                                                 | 11  | 11  | 1  | [10] |
|           | Cracklebred                   | Breton Enterprises Inc                                          | 11  | 11  | 1  | [1]  |
|           | Multigrain Bread              | Corn, GF Wheat with Linseed, Sunflower, Pumpkin Seeds           | 11  | 11  | 1  | [5]  |
|           | Brioche Bread                 |                                                                 | 10  | 10  | 1  | [11] |
|           | Bread Prepared With Olives    |                                                                 | 10  | 10  | 1  | [11] |
|           | Bread Prepared With Oil       |                                                                 | 9   | 9   | 1  | [11] |
|           | Bread With Grains             | Corn, GF Wheat with Linseed and Sunflower Seeds                 | 9   | 9   | 1  | [5]  |
|           | White Bread II                |                                                                 | 8   | 8   | 1  | [11] |
|           | Bread                         |                                                                 | 8   | 8   | 1  | [20] |
|           | Multigrain Bread              | Corn, GF Wheat with Linseed, Sunflower, Soya, And Pumpkin Seeds | 7   | 7   | 1  | [5]  |
|           | Crisp Bread                   | Fette Croccanti                                                 | 7   | 7   | 1  | [14] |
|           | White Bread I                 |                                                                 | 6   | 6   | 1  | [11] |
|           | Ciabatta Bread                |                                                                 | 6   | 6   | 1  | [11] |
|           | Sliced White Bread (Sandwich) |                                                                 | 5   | 5   | 1  | [11] |
|           | No Data For 21 Products       |                                                                 |     |     |    |      |
| <b>IV</b> | Breakfast Cereals, Nesquik    | Nestlé Belgilux S.A., Fortified                                 | 561 | 168 | 21 | [21] |
|           | Cerelac                       | Nestlé Belgilux S.A., Fortified                                 | 400 | 120 | 15 | [21] |
|           | Amaranth And Quinoa Flakes    |                                                                 | 276 | 83  | 10 | [3]  |
|           | Amaranth Flakes               |                                                                 | 248 | 74  | 9  | [3]  |
|           | Musli With Amaranth           | Corn, Rice, Amaranth, Millet, Raisins, Raspberry                | 237 | 71  | 9  | [5]  |
|           | All-Purpose Flour             | The King Arthur Flour Company, Inc.                             | 200 | 60  | 8  | [1]  |
|           | Kellogg Special K Cereal      | Kellogg Company Us, Fortified with Fe                           | 163 | 49  | 6  | [1]  |
|           | Granola                       | Oat, Honey, Flax, Sesame, Pumpkin, Sunflower                    | 143 | 43  | 5  | [1]  |
|           | Oats                          | Glutenfreeda Foods, Inc.                                        | 100 | 30  | 4  | [1]  |
|           | Muesli                        | Muesli Fusion, Inc.                                             | 98  | 29  | 4  | [1]  |

|                                                                                                                             |                                                                |    |    |   |      |
|-----------------------------------------------------------------------------------------------------------------------------|----------------------------------------------------------------|----|----|---|------|
| Freedom Muesli                                                                                                              | Surf City Cereal                                               | 95 | 29 | 4 | [1]  |
| Musli                                                                                                                       |                                                                | 95 | 29 | 4 | [11] |
| Amaranth Flakes                                                                                                             |                                                                | 92 | 28 | 3 | [5]  |
| Granola (including Apple Almond Honey Granola)                                                                              | Glutenfreeda Foods, Inc.                                       | 71 | 21 | 3 | [1]  |
| Granola                                                                                                                     | Georgia Peach Products, Inc., Mirracole Morsels                | 71 | 21 | 3 | [1]  |
| Cranberry Nut Crisp Granola                                                                                                 | Delhaize America, Inc.                                         | 71 | 21 | 3 | [1]  |
| Granola                                                                                                                     | Garden Of Light Inc.                                           | 70 | 21 | 3 | [1]  |
| Granola (including Original Granola, Au Natural Granola, Cherry Walnut Granola Clusters, Blueberry Cashew Granola Clusters) | Pinnacle Foods Group Llc, Udi's Gluten Free                    | 67 | 20 | 3 | [1]  |
| Wheat Free, Instant Oatmeal, Strawberries                                                                                   | Glutenfreeda Foods, Inc.                                       | 67 | 20 | 3 | [18] |
| Oatmeal                                                                                                                     | Bob's Red Mill Natural Foods, Inc.                             | 64 | 19 | 2 | [1]  |
| Oatmeal                                                                                                                     | Topco Associates, Inc.                                         | 64 | 19 | 2 | [1]  |
| Rolled Oats                                                                                                                 | Glutenfreeda Foods, Inc.                                       | 64 | 19 | 2 | [18] |
| Amaranth Musli With Fruits                                                                                                  | Oat, Amaranth (20%), Fruits (20%), Hazelnut, Sesame, Buckwheat | 62 | 19 | 2 | [5]  |
| Bread Mix                                                                                                                   | Hodgson Mill                                                   | 61 | 18 | 2 | [1]  |
| Granola, Apple Almond Honey                                                                                                 | Glutenfreeda                                                   | 57 | 17 | 2 | [18] |
| Muesli, Commercial                                                                                                          |                                                                | 57 | 17 | 2 | [12] |
| Superfood Oatmeal                                                                                                           | Nature's Path Organic                                          | 56 | 17 | 2 | [1]  |
| Organic Superfood Oatmeal                                                                                                   | Oat, Coconut, Buckwheat, Chia                                  | 53 | 16 | 2 | [1]  |
| Oatmeal, Cinnamon Pumpkin Seed                                                                                              | Nature's Path Foods Inc.                                       | 53 | 16 | 2 | [1]  |
| Millet Musli                                                                                                                |                                                                | 50 | 15 | 2 |      |
| Oat Bran                                                                                                                    | Bob's Red Mill Natural Foods, Inc.                             | 50 | 15 | 2 | [1]  |
| Homestyle Hot Oatmeal                                                                                                       | Nature's Path Foods Inc.                                       | 50 | 15 | 2 | [1]  |
| Hot Oatmeal, Brown Sugar Maple with Ancient Grains                                                                          | Oat, Amaranth, Quinoa Sorghum                                  | 50 | 15 | 2 | [1]  |
| Instant Oatmeal                                                                                                             | The Quaker Oats Company                                        | 47 | 14 | 2 | [1]  |
| Old Fashioned Oats Oatmeal                                                                                                  | Topco Associates, Inc                                          | 46 | 14 | 2 | [1]  |



|          |                                                                                                        |                                                   |                      |                      |                    |        |
|----------|--------------------------------------------------------------------------------------------------------|---------------------------------------------------|----------------------|----------------------|--------------------|--------|
|          | Granola (Nuts)                                                                                         |                                                   | 45                   | 13                   | 2                  | [10]   |
|          | Oat Musli With Fruits                                                                                  | Oat, Fruits, Dates, Raisins, Sunflower Seeds      | 44                   | 13                   | 2                  | [5]    |
|          | Mixed Berry Instant Oatmeal                                                                            | Topco Associates, Inc.                            | 43                   | 13                   | 2                  | [1]    |
|          | Instant Oatmeal                                                                                        | Glutenfreeda                                      | 43                   | 13                   | 2                  | [18]   |
|          | Oatmeal (including Strawberries & Brown Sugar W/ Flax Oatmeal, Blueberries & Cinnamon W/ Flax Oatmeal) | Glutenfreeda                                      | 40                   | 12                   | 2                  | [18]   |
|          | Oats (including Maple Raisin with Flax, Steel Cut Oats)                                                | Glutenfreeda                                      | 40                   | 12                   | 2                  | [18]   |
|          | Oat Flakes                                                                                             |                                                   | 34                   | 10                   | 1                  | [5]    |
|          | Instant Oatmeal, Natural                                                                               | Glutenfreeda                                      | 32                   | 10                   | 1                  | [18]   |
|          | 4-Grain Flakes                                                                                         | Oat Flakes, Corn Flakes, Rice Flour, Miller Flour | 28                   | 8                    | 1                  | [17]   |
|          | Wild Rice Flakes                                                                                       | From Greece                                       | 27                   | 8                    | 1                  | [22]   |
|          | Wild Rice Flakes                                                                                       | From Cambodia                                     | 26                   | 8                    | 1                  | [22]   |
|          | Wild Rice Flakes                                                                                       | From Hungary                                      | 22                   | 7                    | 1                  | [22]   |
|          | Granola (Chocolate)                                                                                    |                                                   | 18                   | 5                    | 1                  | [10]   |
|          | Wild Rice Flakes                                                                                       | From Canada                                       | 17                   | 5                    | 1                  | [22]   |
|          | Buckwheat Flakes                                                                                       |                                                   | 15                   | 4                    | 1                  | [5]    |
|          | Sorghum Flakes                                                                                         | Variety: Liberty                                  | 13                   | 4                    | 0                  | [23]   |
|          | Millet Flakes                                                                                          |                                                   | 12                   | 4                    | 0                  | [5]    |
|          | Sorghum Flakes                                                                                         | Variety: Is8237c and Alpha                        | 11 (11) <sup>1</sup> | 3 (3) <sup>1</sup>   | 0 (0) <sup>1</sup> | [23]   |
|          | Rice Flakes                                                                                            |                                                   | 9                    | 3                    | 0                  | [5]    |
|          | Cornflakes                                                                                             |                                                   | 9 (8-9) <sup>1</sup> | 3 (2-3) <sup>1</sup> | 0 (0) <sup>1</sup> | [3,10] |
|          | No Data For 8 Products                                                                                 |                                                   |                      |                      |                    |        |
| <b>V</b> | Culinary Ancient Grains                                                                                | Quinoa Corporation                                | 169                  | 85                   | 11                 | [3]    |
|          | Ancient Quinoa Harvest Quinoa                                                                          | Quinoa Corporation                                | 159                  | 80                   | 10                 | [3]    |
|          | Steel Cut Oats                                                                                         |                                                   | 120                  | 60                   | 8                  | [5]    |
|          | Happy Quick Oats                                                                                       | Garden Of Light Inc.                              | 74                   | 37                   | 5                  | [1]    |
|          | Whole Grain Steel Cut Oats                                                                             | Bob's Red Mill Natural Foods, Inc.                | 61                   | 31                   | 4                  | [3]    |

|    |                             |                                         |                      |                      |                    |         |
|----|-----------------------------|-----------------------------------------|----------------------|----------------------|--------------------|---------|
|    | Old Fashioned Oats          | Country Choice Organic                  | 44                   | 22                   | 3                  | [1]     |
|    | White Rice                  |                                         | 32                   | 16                   | 2                  | [3]     |
|    | Brown Rice                  |                                         | 30                   | 15                   | 2                  | [1]     |
|    | Enriched White Rice         |                                         | 29                   | 15                   | 2                  | [1]     |
|    | Amaranth Popping            |                                         | 28                   | 14                   | 2                  | [24]    |
|    | Rice Cakes With Quinoa      | Rice, Quinoa (5%)                       | 28                   | 14                   | 2                  | [3]     |
|    | Couscous                    |                                         | 26                   | 13                   | 2                  | [3]     |
|    | Corn Couscous               |                                         | 25                   | 13                   | 2                  | [3]     |
|    | Brown Rice Snack            | Brown Rice                              | 23                   | 12                   | 1                  | [24]    |
|    | Brown Rice & Chestnut Snack | Brown Rice, Chestnut Flour (20%)        | 22                   | 11                   | 1                  | [5]     |
|    | Brown Rice & Chestnut Snack | Brown Rice, Chestnut Flour (40%)        | 10                   | 5                    | 1                  | [3]     |
|    | Brown Rice & Chestnut Snack | Brown Rice, Chestnut Flour (60%)        | 10                   | 5                    | 1                  | [3]     |
|    | Rough Rice                  |                                         | 8                    | 4                    | 1                  | [25]    |
|    | Milled Rice                 |                                         | 8                    | 4                    | 1                  | [25]    |
|    | Tapioca                     |                                         | 7                    | 4                    | 0                  | [25]    |
|    | Amaranth Groats             |                                         | 6                    | 3                    | 0                  | [25]    |
|    | Cous-Cous                   |                                         | 5 (4-6) <sup>1</sup> | 3 (2-3) <sup>1</sup> | 0 (0) <sup>1</sup> | [10,11] |
|    | No Data For 7 Products      |                                         |                      |                      |                    |         |
| VI | Pasta                       | The Hain Celestial Group, Inc. Deboles  | 70                   | 35                   | 4                  | [1]     |
|    | Rice Lasagna                | The Hain Celestial Group, Inc.          | 56                   | 28                   | 4                  | [1]     |
|    | Pasta With Teff             | Corn, Teff (31%)                        | 56                   | 28                   | 3                  | [5]     |
|    | Soya Pasta                  |                                         | 51                   | 26                   | 3                  | [3]     |
|    | Vermicelli                  |                                         | 45                   | 23                   | 3                  | [10]    |
|    | Tagliatelli                 |                                         | 42                   | 21                   | 3                  | [10]    |
|    | Pasta                       | Millet-Pomace                           | 42                   | 21                   | 3                  | [26]    |
|    | Egg Pasta                   |                                         | 38                   | 19                   | 2                  | [11]    |
|    | Organic Elbows              | Euro-Usa Trading Co., Inc.              | 35                   | 18                   | 2                  | [1]     |
|    | Linguini                    | Euro-Usa Trading Co., Inc. , Bionaturae | 35                   | 18                   | 2                  | [1]     |
|    | Lasagne Sheets              |                                         | 31                   | 16                   | 3                  | [10]    |

|                                    |                                              |                         |                       |                      |          |
|------------------------------------|----------------------------------------------|-------------------------|-----------------------|----------------------|----------|
| Pasta                              | Extruded Rice (75%), Amaranth (25%)          | 30                      | 15                    | 2                    | [27]     |
| Pasta                              | Rice (75%), Amaranth (25%)                   | 30                      | 15                    | 2                    | [27]     |
| Pasta                              | Extruded Rice (75%), Extruded Amaranth (25%) | 29                      | 14                    | 2                    | [27]     |
| Buckwheat Pasta                    |                                              | 26                      | 13                    | 2                    | [3]      |
| Fresh Fusilli                      | Rp's Fresh Pasta                             | 24                      | 12                    | 2                    | [1]      |
| Penne                              |                                              | 23                      | 12                    | 1                    | [10]     |
| Fresh Linguini                     | Rp's Fresh Pasta                             | 20                      | 10                    | 1                    | [1]      |
| Brown Rice Pasta                   |                                              | 18                      | 9                     | 1                    | [5]      |
| Spaghetti                          |                                              | 18                      | 9                     | 1                    | [10]     |
| Rice Pasta                         |                                              | 17                      | 9                     | 1                    | [3]      |
| Pasta,                             |                                              | 16 (15-16) <sup>1</sup> | 9 (8-10) <sup>1</sup> | 1 (0-1) <sup>1</sup> | [12,15]  |
| Fusilli                            |                                              | 15                      | 8                     | 1                    | [10]     |
| Pasta, Made of Rice and Vegetables | Orgran Tricolore                             | 14                      | 7                     | 1                    | [9]      |
| Pasta, Spaghetti                   | Semper                                       | 14                      | 7                     | 1                    | [9]      |
| Pasta With Buckwheat Flour         | Corn, Rice, Buckwheat (15%                   | 14                      | 7                     | 1                    | [5]      |
| Wholemeal Pasta                    |                                              | 12                      | 6                     | 1                    | [11]     |
| Pasta                              | Brown Rice (87%), Corn (13%)                 | 8                       | 4                     | 1                    | [13]     |
| Pasta D'oro Linguine               | Corn, Potato, Lupin                          | 7                       | 4                     | 0                    | [1]      |
| Pasta Made with Different Flours   |                                              | 7                       | 4                     | 0                    | [11]     |
| Pasta for Broth                    |                                              | 7                       | 4                     | 0                    | [11]     |
| Corn Pasta                         |                                              | 5 (4-6) <sup>1</sup>    | 3 (2-3) <sup>1</sup>  | 0 (0) <sup>1</sup>   | [1,3,11] |
| Rice Pasta                         |                                              | 6                       | 3                     | 0                    | [11]     |
| Pasta                              | Schar                                        | 6                       | 3                     | 0                    | [14]     |
| Pasta                              | Brown Rice (60%), Corn (40%)                 | 6                       | 3                     | 0                    | [13]     |
| Pasta, Made of Corn And Rice       | Barilla                                      | 5                       | 3                     | 0                    | [9]      |
| Pasta                              | Corn, Rice                                   | 4                       | 2                     | 0                    | [5]      |
| Pasta                              | Rice                                         | 4                       | 2                     | 0                    | [27]     |
| Pasta                              | Extruded Rice                                | 3                       | 2                     | 0                    | [27]     |
| No Data For 27 Products            |                                              |                         |                       |                      |          |

<sup>1</sup>The average, minimum and maximum content/RNI of mineral in the same product from different references.

**Table S2.** Iron in I – flours, II – mixes for cooking, III – bakery products, IV – cereals and flakes, V – groats and rice, VI – pasta.

|              | PRODUCT                        | PRODUCER/INGREDIENTS/OTHER INFORMATION | MG 100 G                    | MG PORTION                 | RNI PORTION             | REFERENCE |
|--------------|--------------------------------|----------------------------------------|-----------------------------|----------------------------|-------------------------|-----------|
| I            | Acorn Flour                    |                                        | 18.6                        | 5.6                        | 40                      | [5]       |
|              | Teff Flour                     |                                        | 8.6 (7.6–9.8) <sup>1</sup>  | 2.6 (2.3–2.9) <sup>1</sup> | 18 (16–21) <sup>1</sup> | [3,5–7]   |
|              | Quinoa Flour                   |                                        | 8.3 (5.4–11.2) <sup>1</sup> | 2.5 (1.6–3.4) <sup>1</sup> | 18 (11–24) <sup>1</sup> | [6–8]     |
|              | Pantry                         | The Pantry, Inc                        | 9.0                         | 2.7                        | 19                      | [1]       |
|              | Flour, Coarse                  | Semper                                 | 8.5                         | 2.6                        | 18                      | [9]       |
|              | Amaranth Flour                 |                                        | 7.9 (6.0–8.4) <sup>1</sup>  | 2.4 (1.8–2.5) <sup>1</sup> | 17 (13–18) <sup>1</sup> | [2]       |
|              | Amaranth Flour<br>Roasted      |                                        | 7.5                         | 2.3                        | 16                      | [3]       |
|              | Measure for Measure<br>Flour   | The King Arthur Flour Company, Inc.    | 5.8                         | 1.7                        | 12                      | [1]       |
|              | Chickpea Flour                 |                                        | 4.6 (4.3–4.9) <sup>1</sup>  | 1.4 (1.3–1.5) <sup>1</sup> | 10 (9–11) <sup>1</sup>  | [3,5]     |
|              | Buckwheat Flour                |                                        | 4.3 (1.8–8.3) <sup>1</sup>  | 1.3 (0.5–2.5) <sup>1</sup> | 9 (4–18) <sup>1</sup>   | [3,5–7]   |
|              | Oat Flour                      |                                        | 3.5 (1.6–5.5) <sup>1</sup>  | 1.0 (0.5–1.6) <sup>1</sup> | 8 (4–12) <sup>1</sup>   | [3,5–7]   |
|              | Millet Flour                   |                                        | 3.4 (3.1–3.7) <sup>1</sup>  | 1.0 (0.9–1.1) <sup>1</sup> | 8 (7–9) <sup>1</sup>    | [3,5]     |
|              | Wholesome Flour                | Cup4cup, Llc                           | 3.1                         | 0.9                        | 7                       | [1]       |
|              | Sorghum Flour                  |                                        | 2.7                         | 0.8                        | 6                       | [6,7]     |
|              | Flour                          | Jyttemel Original                      | 2.5                         | 0.8                        | 5                       | [9]       |
|              | Bread Flour                    |                                        | 2.4                         | 0.7                        | 5                       | [1]       |
|              | Veganic Sprouted<br>Corn Flour | Veganic                                | 2.4                         | 0.7                        | 5                       | [1]       |
|              | Whole Grain Bread<br>Flour     |                                        | 2.4                         | 0.7                        | 5                       | [1]       |
|              | Chestnut Flour                 |                                        | 1.8 (1.2–2.4) <sup>1</sup>  | 0.6 (0.4–0.7) <sup>1</sup> | 4 (3–5) <sup>1</sup>    | [3,5]     |
|              | Flour                          |                                        | 1.4                         | 0.4                        | 3                       | [10]      |
|              | Flour, Mix                     | Rice, Soy, Corn, Tapioca               | 1.3                         | 0.4                        | 3                       | [12]      |
| Banana Flour | Wedo Entrepreneurs, Llc        | 1.2                                    | 0.4                         | 3                          | [1]                     |           |

|           |                                                  |                                     |                            |                            |                      |            |
|-----------|--------------------------------------------------|-------------------------------------|----------------------------|----------------------------|----------------------|------------|
|           | Pastry Flour                                     | Sorghum, Rice, Teff, Millet, Corn   | 1.2                        | 0.4                        | 3                    | [1]        |
|           | Flour With 10% Of Oat Flour                      | Corn, Potato, Oat                   | 1.2                        | 0.3                        | 2                    | [5]        |
|           | Rice Flour                                       |                                     | 1.1 (0.4–2.0) <sup>1</sup> | 0.3 (0.1–0.6) <sup>1</sup> | 2 (1–4) <sup>1</sup> | [3,5–7,24] |
|           | Brown Rice Flour                                 |                                     | 1.0                        | 0.3                        | 2                    | [13]       |
|           | All-Purpose Flour                                |                                     | 0.9                        | 0.3                        | 2                    | [1]        |
|           | Corn Flour                                       |                                     | 0.6 (0.1–0.9) <sup>1</sup> | 0.2 (0.0–0.3) <sup>1</sup> | 1 (0–2) <sup>1</sup> | [5–7,13]   |
|           | Flour                                            | Schär                               | 0.6                        | 0.2                        | 1                    | [9]        |
|           | Rice Starch                                      |                                     | 0.4                        | 0.1                        | 1                    | [3]        |
|           | Corn Starch                                      |                                     | 0.2                        | 0.1                        | 0                    | [3]        |
|           | Mixed Flours                                     |                                     | 0.0                        | 0.0                        | 0                    | [11]       |
|           | No Data For 11 Products                          |                                     |                            |                            |                      |            |
| <b>II</b> | Cornbread Mix                                    | The King Arthur Flour Company, Inc. | 6.9                        | 2.1                        | 15                   | [1]        |
|           | Chocolate Cake Mix                               | The King Arthur Flour Company, Inc. | 6.0                        | 1.8                        | 13                   | [1]        |
|           | Brownie Mix                                      | Aldi–Benner Company                 | 6.0                        | 1.8                        | 13                   | [1]        |
|           | Cake Mix                                         | Cup4cup, Llc                        | 5.5                        | 1.7                        | 12                   | [1]        |
|           | Cake Mix                                         | Bob's Red Mill Natural Foods, Inc.  | 5.1                        | 1.5                        | 11                   | [1]        |
|           | Brownie Mix                                      |                                     | 5.1                        | 1.5                        | 11                   | [1]        |
|           | Brownie Mix, Double Chocolate                    | The Pantry, Inc. Glutino            | 4.9                        | 1.5                        | 10                   | [1]        |
|           | Brownie Mix                                      | Bob's Red Mill Natural Foods, Inc.  | 4.9                        | 1.5                        | 10                   | [1]        |
|           | Southern Glory, Biscuits Baking Mix              | 1–2–3, Inc.                         | 4.7                        | 1.4                        | 10                   | [1]        |
|           | Premium Biscuit Mix                              | Duinkerken Foods Inc.               | 4.5                        | 1.4                        | 10                   | [1]        |
|           | Bread Mix                                        | Bob's Red Mill Natural Foods, Inc.  | 4.1                        | 1.2                        | 9                    | [1]        |
|           | GF Wheat-Free Baking Mix, Classic Chocolate Cake | Schnuck Markets, Inc.               | 4.1                        | 1.2                        | 9                    | [1]        |
|           | Baking Mix White                                 | Glutafin                            | 4.0                        | 1.2                        | 9                    | [14]       |
|           | Baking Mix Brown                                 | Glutafin                            | 4.0                        | 1.2                        | 9                    | [14]       |

|                                                             |                                                      |     |     |   |      |
|-------------------------------------------------------------|------------------------------------------------------|-----|-----|---|------|
| Betty Crocker<br>Chocolate Brownie<br>Mix                   | General Mills Sales Inc.                             | 3.9 | 1.2 | 8 | [1]  |
| Immaculate Baking<br>Company Double<br>Chocolate Cookie Mix | General Mills Sales Inc.                             | 3.6 | 1.1 | 8 | [1]  |
| Cookie Mix                                                  | Bob's Red Mill Natural Foods, Inc.                   | 3.5 | 1.0 | 7 | [1]  |
| Betty Crocker Devil's<br>Food Cake Mix                      | General Mills Sales Inc.                             | 3.4 | 1.0 | 7 | [1]  |
| Chewy Chocolate<br>Brownie Mix                              | Bella Llc                                            | 3.3 | 1.0 | 7 | [1]  |
| Organic Bake Mix                                            | Mr. Beverages Old Time Cocktail Mixes                | 3.1 | 0.9 | 7 | [1]  |
| Oat Mix for Chocolate<br>Muffins                            | Oat (20%), Potato, Rice                              | 3.0 | 0.9 | 6 | [5]  |
| Oat Cookies Mix                                             | Oat (45%), Rice, Corn                                | 3.0 | 0.9 | 6 | [5]  |
| Fudge Brownie Mi                                            | Arrowhead Mills                                      | 2.9 | 0.9 | 6 | [1]  |
| Oat Mix For Bread                                           | Oat (61%), Potato                                    | 2.8 | 0.8 | 6 | [5]  |
| Pancake + Baking Mix                                        | Schnuck Markets, Inc.                                | 2.7 | 0.8 | 6 | [1]  |
| Bread Mix                                                   | Bob's Red Mill Natural Foods, Inc.                   | 2.6 | 0.8 | 6 | [1]  |
| Divinely Decadent,<br>Silky & Rich Brownies<br>Baking Mix   | 1-2-3, Inc.                                          | 2.5 | 0.7 | 5 | [1]  |
| Breadcrumbs                                                 |                                                      | 2.3 | 0.7 | 5 | [10] |
| Fluffy Pancake Mix                                          | The Pantry, Inc. Glutino                             | 2.1 | 0.6 | 4 | [1]  |
| Cookie Mix                                                  | The King Arthur Flour Company, Inc.                  | 1.9 | 0.6 | 4 | [1]  |
| Muffin Mix                                                  | Cup4cup, Llc                                         | 1.8 | 0.6 | 4 | [1]  |
| All Purpose Baking<br>Mix                                   | New Hope Mills Manufacturing, Inc.                   | 1.8 | 0.5 | 4 | [1]  |
| Bake Mix (Pizza)                                            |                                                      | 1.5 | 0.4 | 4 | [10] |
| Multigrain Mix For<br>Bread                                 | Corn, Rice, Linseed Flour (6%), Sunflower Seeds (6%) | 1.4 | 0.4 | 3 | [5]  |
| Cookie Mix, Chocolate<br>Chip                               | Aldi-Benner Company                                  | 1.3 | 0.4 | 3 | [1]  |
| Betty Crocker<br>Chocolate Chip<br>Cookie Mix               | General Mills Sales Inc.                             | 1.3 | 0.4 | 3 | [1]  |

|                                             |                                     |     |     |   |      |
|---------------------------------------------|-------------------------------------|-----|-----|---|------|
| Cake Base, Powder                           | Toro                                | 1.3 | 0.4 | 3 | [9]  |
| Cornbread Mix                               | Cup4cup, Llc                        | 1.3 | 0.4 | 3 | [1]  |
| Sugar Cookie Mix                            | The King Arthur Flour Company, Inc. | 1.3 | 0.4 | 3 | [1]  |
| Bake Mix Brown<br>(Cake)                    |                                     | 1.2 | 0.4 | 3 | [10] |
| Bake Mix White<br>(Cake)                    |                                     | 1.2 | 0.4 | 3 | [10] |
| Vanilla Cupcake Mix                         | New Hope Mills Manufacturing, Inc.  | 1.1 | 0.3 | 2 | [1]  |
| Blueberry Muffin Mix                        | Continental Mills, Inc.             | 1.1 | 0.3 | 2 | [1]  |
| Bisquick Baking Mix<br>Pancake & Waffle Mix | General Mills Sales Inc.            | 1.1 | 0.3 | 2 | [1]  |
| Breadcrumbs                                 |                                     | 1.0 | 0.3 | 2 | [11] |
| Cornbread Mix                               | Bob's Red Mill Natural Foods, Inc.  | 1.0 | 0.3 | 2 | [1]  |
| Baking Mix, Chocolate<br>Cake               | The Kroger Co.                      | 1.0 | 0.3 | 2 | [1]  |
| Muffin Mix                                  | Corn, Buckwheat                     | 1.0 | 0.3 | 2 | [5]  |
| Pancake Mi                                  |                                     | 1.0 | 0.3 | 2 | [1]  |
| Muffin Mix                                  | New Hope Mills Manufacturing, Inc.  | 1.0 | 0.3 | 2 | [1]  |
| Muffin Mix                                  | Namaste Foods                       | 1.0 | 0.3 | 2 | [1]  |
| Biscuits, Piecrust &<br>More Baking Mix     | Namaste Foods                       | 1.0 | 0.3 | 2 | [1]  |
| Flour For Cakes                             |                                     | 0.9 | 0.3 | 2 | [28] |
| All Purpose Baking<br>Mix                   | The Kroger Co.                      | 0.9 | 0.3 | 2 | [1]  |
| Flour Mix For Bread                         |                                     | 0.9 | 0.3 | 2 | [15] |
| Pancake Mix                                 | Giant Eagle, Inc.                   | 0.9 | 0.3 | 2 | [1]  |
| Pancake Mix                                 | Bob's Red Mill Natural Foods, Inc.  | 0.9 | 0.3 | 2 | [1]  |
| Cake Flour Mix                              |                                     | 0.8 | 0.2 | 3 | [15] |
| Yellow Cake Mix                             | Aldi-Benner Company                 | 0.8 | 0.3 | 2 | [1]  |
| Spice Cake Mix                              | Namaste                             | 0.8 | 0.2 | 2 | [1]  |
| Yellow Cake Mix                             | Cup4cup, Llc                        | 0.8 | 0.2 | 2 | [1]  |
| Stuffing Mix                                | Marie Antoinette's Bake Shoppe      | 0.7 | 0.2 | 2 | [1]  |

|     |                                                                  |                                                                                                |     |     |     |      |
|-----|------------------------------------------------------------------|------------------------------------------------------------------------------------------------|-----|-----|-----|------|
|     | Brownie Mix with Fudge Frosting                                  |                                                                                                | 0.7 | 0.2 | 1   | [1]  |
|     | Cake Mix, Powder, Toro                                           | Toro                                                                                           | 0.4 | 0.1 | 1   | [9]  |
|     | Bread Mix                                                        | Corn, GF Wheat                                                                                 | 0.3 | 0.1 | 1   | [5]  |
|     | Baking Mix White                                                 | Schar                                                                                          | 0.1 | 0.0 | 0.0 | [14] |
|     | Flour Mix                                                        |                                                                                                | 0.0 | 0   | 0   | [15] |
|     | Flour for Cake                                                   |                                                                                                | 0.0 | 0   | 0   | [11] |
|     | Flour for Bread                                                  |                                                                                                | 0.0 | 0   | 0   | [11] |
|     | No Data for 10 Products                                          |                                                                                                |     |     |     |      |
| III | Crisp Bread, Prepared from Powder                                | Toro                                                                                           | 7.0 | 7.0 | 50  | [9]  |
|     | Brown Bread                                                      | Rice, Corn, Potato                                                                             | 6.9 | 6.9 | 49  | [5]  |
|     | Shortbread                                                       |                                                                                                | 4.8 | 4.8 | 34  | [28] |
|     | Local Bread P.                                                   |                                                                                                | 4.2 | 4.2 | 30  | [28] |
|     | Seed Crispbread                                                  | Water, Buckwheat Flour, Sunflower Seed, Pumpkin Seed, Sesame Seed, Rapeseed Oil, Linseed, Salt | 4.1 | 4.1 | 29  | [17] |
|     | Wholesome Bread,                                                 | Katz                                                                                           | 4.0 | 4.0 | 29  | [18] |
|     | Local Bread B.                                                   |                                                                                                | 4.0 | 4.0 | 29  | [28] |
|     | Sprouted Seeds Bread                                             | Grindstone Bakery                                                                              | 3.8 | 3.8 | 27  | [1]  |
|     | Original Sandwich Bread                                          | Rudi's Bakery                                                                                  | 3.6 | 3.6 | 26  | [1]  |
|     | Classic White Rolls                                              | Dr. Schar Usa, Inc.                                                                            | 3.6 | 3.6 | 26  | [1]  |
|     | Baguette Gourmet Garlic Bread & Subs                             | Dr. Schar Usa, Inc.                                                                            | 3.3 | 3.3 | 23  | [1]  |
|     | Omega Flax Bread                                                 | Silver Hills                                                                                   | 3.1 | 3.1 | 22  | [1]  |
|     | Bread, Deli Slice Classic White                                  | The Essential Baking Company, Inc.                                                             | 3.1 | 3.1 | 22  | [1]  |
|     | Ancient Grains Bread                                             | Coborn's Bakery                                                                                | 2.9 | 2.9 | 21  | [18] |
|     | Rolls, White, Made With Rice Flour, Rice Starch, And Corn Starch |                                                                                                | 2.8 | 2.8 | 20  | [1]  |



|                                                                 |                                                                                                                        |     |     |    |      |
|-----------------------------------------------------------------|------------------------------------------------------------------------------------------------------------------------|-----|-----|----|------|
| Bread, White, Made With Rice Flour, Corn Starch, And/Or Tapioca |                                                                                                                        | 2.6 | 2.6 | 19 | [1]  |
| Bread White                                                     | Glutafin                                                                                                               | 2.6 | 2.6 | 19 | [14] |
| Flax Bread                                                      | Food for Life Baking Co Inc                                                                                            | 2.5 | 2.5 | 18 | [1]  |
| Bread Brown                                                     | Glutafin                                                                                                               | 2.5 | 2.5 | 18 | [14] |
| Millet Bread                                                    |                                                                                                                        | 2.4 | 2.4 | 17 | [15] |
| Wholegrain Bread                                                |                                                                                                                        | 2.4 | 2.4 | 17 | [10] |
| Rustic Multigrain Dinner Roll Mix, Seeds & Grains               | Bella Llc                                                                                                              | 2.2 | 2.2 | 16 | [1]  |
| Bread with Grains                                               | Corn, GF Wheat with Linseed, And Sunflower Seeds                                                                       | 2.2 | 2.2 | 16 | [5]  |
| Bread Crumbs                                                    |                                                                                                                        | 2.1 | 2.1 | 15 | [15] |
| Buckwheat Bread with Milk And Seeds                             | Buckwheat Flour, Potato Starch, Corn Starch, Milk Powder, Seeds (Poppy, Amaranth, Flax, Sunflower, Pumpkin, Hazelnuts) | 2.1 | 2.1 | 15 | [16] |
| Multigrain Bread                                                | Corn, GF Wheat With Linseed (2.7%), Sunflower (2.7%), And Pumpkin Seeds (2.7%)                                         | 2.1 | 2.1 | 15 | [5]  |
| Sesame Bagels                                                   | Katz                                                                                                                   | 1.9 | 1.9 | 14 | [18] |
| Seeds & Grains Bread                                            | Glencourt Inc.                                                                                                         | 1.9 | 1.9 | 14 | [1]  |
| Bread with Oilseeds                                             |                                                                                                                        | 1.9 | 1.9 | 14 | [15] |
| Multigrain Bread                                                | Corn, GF Wheat with Linseed, Sunflower, Soya, And Pumpkin Seeds                                                        | 1.8 | 1.8 | 13 | [5]  |
| Seeded Whole Grain Dinner Rolls                                 | Pinnacle Foods Group Llc                                                                                               | 1.8 | 1.8 | 13 | [1]  |
| Buckwheat Bread with Milk                                       | Buckwheat Flour, Potato Starch, Corn Starch, Milk Powder                                                               | 1.7 | 1.7 | 12 | [16] |
| Sprouted for Life, Almond Bread                                 | Food for Life Baking Co Inc                                                                                            | 1.7 | 1.7 | 12 | [1]  |
| Original 3 Seed Bread                                           | Food for Life Baking Co Inc                                                                                            | 1.7 | 1.7 | 12 | [1]  |
| Whole Grain Dinner Rolls                                        | Udi's Gluten Free                                                                                                      | 1.6 | 1.6 | 12 | [1]  |
| Toast                                                           |                                                                                                                        | 1.6 | 1.6 | 12 | [10] |

|                                                                            |                                                                                                                         |                            |                            |                        |            |
|----------------------------------------------------------------------------|-------------------------------------------------------------------------------------------------------------------------|----------------------------|----------------------------|------------------------|------------|
| Rolls, Whole Grain,<br>Made with Tapioca<br>Starch and Brown Rice<br>Flour |                                                                                                                         | 1.6                        | 1.6                        | 12                     | [1]        |
| Rice Bread with Milk<br>and Seeds                                          | Rice Flour, Potato Starch, Corn Starch, Milk Powder,<br>Seeds (Poppy, Amaranth, Flax, Sunflower, Pumpkin,<br>Hazelnuts) | 1.5                        | 1.5                        | 10                     | [16]       |
| Corn Dogs                                                                  | Foster Poultry Farms                                                                                                    | 1.4                        | 1.4                        | 10                     | [1]        |
| Crispbread                                                                 |                                                                                                                         | 1.4 (0.8–2.6) <sup>1</sup> | 1.4 (0.8–2.6) <sup>1</sup> | 11 (1–19) <sup>1</sup> | [10,11,15] |
| Bread, Flax, Vegan                                                         | The Bakery                                                                                                              | 1.4                        | 1.4                        | 10                     | [18]       |
| Bread, With Added<br>Grains, Commercial                                    |                                                                                                                         | 1.3                        | 1.3                        | 10                     | [12]       |
| Bread, Homemade<br>from Basic Ingredients                                  |                                                                                                                         | 1.3                        | 1.3                        | 9                      | [12]       |
| Industrial Bread                                                           |                                                                                                                         | 1.3                        | 1.3                        | 9                      | [28]       |
| Bread, Cinnamon<br>Raisin                                                  |                                                                                                                         | 1.2                        | 1.2                        | 9                      | [1]        |
| Rice Bread With Milk                                                       | Rice Flour, Potato Starch, Corn Starch, Milk Powder                                                                     | 1.2                        | 1.2                        | 9                      | [16]       |
| Buckwheat Bread                                                            | Buckwheat Flour, Potato Starch, Corn Starch                                                                             | 1.2                        | 1.2                        | 8                      | [16]       |
| Artisan Baker White<br>Bread                                               | Dr. Schar Usa, Inc.                                                                                                     | 1.2                        | 1.2                        | 8                      | [1]        |
| Bread                                                                      | GF Wheat, Millet Flour; Corn Starch                                                                                     | 1.1                        | 1.1                        | 8                      | [19]       |
| Bread, Cinnamon–<br>Raisin                                                 | The Essential Baking Company, Inc.                                                                                      | 1.1                        | 1.1                        | 8                      | [1]        |
| Sunny Seeded White,<br>Bread                                               | The Essential Baking Company, Inc.                                                                                      | 1.1                        | 1.1                        | 8                      | [1]        |
| Soft & Hearty Whole<br>Grain Bread                                         | Pinnacle Foods Group Llc                                                                                                | 1.1                        | 1.1                        | 8                      | [1]        |
| Original Cracklebred                                                       | Breton Enterprises Inc                                                                                                  | 1.1                        | 1.1                        | 8                      | [1]        |
| Bagels, Plain                                                              | Katz                                                                                                                    | 1.0                        | 1.0                        | 7                      | [18]       |
| Bagels, Poppy Seed                                                         | Katz                                                                                                                    | 1.0                        | 1.0                        | 7                      | [18]       |
| Multigrain Bread                                                           | Wal–Mart Stores, Inc.                                                                                                   | 1.0                        | 1.0                        | 7                      | [1]        |
| White Bread                                                                | The Kroger Co.                                                                                                          | 1.0                        | 1.0                        | 7                      | [1]        |
| 7 Grain Bread                                                              | The Kroger Co.                                                                                                          | 1.0                        | 1.0                        | 7                      | [1]        |
| Bread, Commercial                                                          |                                                                                                                         | 1.0                        | 1.0                        | 7                      | [12]       |

|                                                                                      |                                                                                        |     |     |   |      |
|--------------------------------------------------------------------------------------|----------------------------------------------------------------------------------------|-----|-----|---|------|
| Millet Sandwich Bread                                                                | Brittany Records                                                                       | 1.0 | 1.0 | 7 | [1]  |
| Bakehouse,<br>Hamburger Buns                                                         | Harry's Farmers Market, Ltd.                                                           | 1.0 | 1.0 | 7 | [1]  |
| Ciabatta                                                                             |                                                                                        | 1.0 | 1.0 | 7 | [10] |
| Raisin Brea                                                                          |                                                                                        | 1.0 | 1.0 | 7 | [10] |
| Wholemeal Bread                                                                      |                                                                                        | 1.0 | 1.0 | 7 | [11] |
| OfT & Chewy Bagels,<br>Cinnamon Raisin                                               | Pinnacle Foods Group Llc                                                               | 0.9 | 0.9 | 7 | [1]  |
| 7 Grain Bread                                                                        | United States Bakery                                                                   | 0.9 | 0.9 | 6 | [1]  |
| Swiss Roll                                                                           | Egg Without Shell, Sugar, Corn Flour, Potato Starch,<br>Baking Powder, Mixed Berry Jam | 0.9 | 0.9 | 6 | [17] |
| Bread                                                                                | Semper                                                                                 | 0.9 | 0.9 | 6 | [9]  |
| GF Wheat-Free,<br>Classic White Bread                                                | Andrea's                                                                               | 0.9 | 0.9 | 6 | [1]  |
| Rolls, White, Made<br>with Brown Rice<br>Flour, Tapioca Starch,<br>And Sorghum Flour |                                                                                        | 0.9 | 0.9 | 6 | [1]  |
| Bread with Raisins<br>and Pecan                                                      | Food for Life Baking Co Inc                                                            | 0.8 | 0.8 | 6 | [1]  |
| Exotic Black Rice<br>Bread                                                           | Food for Life Baking Co Inc                                                            | 0.8 | 0.8 | 6 | [1]  |
| Bread, Bhutanese Red<br>Rice                                                         | Food for Life Baking Co Inc                                                            | 0.8 | 0.8 | 6 | [1]  |
| Soft & Hearty Whole<br>Grain Bread                                                   | Udi's Gluten Free                                                                      | 0.8 | 0.8 | 6 | [18] |
| Classic French Dinner<br>Rolls                                                       | Udi's Gluten Free                                                                      | 0.8 | 0.8 | 6 | [1]  |
| Rolls, White, Made<br>with Brown Rice<br>Flour, Tapioca Starch,<br>And Potato Starch |                                                                                        | 0.8 | 0.8 | 6 | [1]  |
| Soft Dinner Roll                                                                     | Rudi's Bakery                                                                          | 0.8 | 0.8 | 6 | [1]  |
| Bread, White, Made<br>with Potato Extract,<br>Rice Starch, And Rice<br>Flour         |                                                                                        | 0.8 | 0.8 | 6 | [1]  |

|                                                                            |                                        |     |     |   |      |
|----------------------------------------------------------------------------|----------------------------------------|-----|-----|---|------|
| Bread, Whole Grain,<br>Made with Tapioca<br>Starch and Brown Rice<br>Flour |                                        | 0.8 | 0.8 | 6 | [1]  |
| Millet Sandwich Bread                                                      | Nation                                 | 0.8 | 0.8 | 6 | [18] |
| Chestnut Bread                                                             |                                        | 0.8 | 0.8 | 6 | [15] |
| Raisin Bread                                                               |                                        | 0.8 | 0.8 | 6 | [15] |
| Scone                                                                      |                                        | 0.8 | 0.8 | 6 | [10] |
| White Bread                                                                |                                        | 0.7 | 0.7 | 5 | [15] |
| Soft & Sweet<br>Cinnamon & Raisin<br>Bread                                 | Pinnacle Foods Group Llc               | 0.7 | 0.7 | 5 | [1]  |
| Flatbread Pita                                                             | Entertainment Production House Inc.    | 0.7 | 0.7 | 5 | [1]  |
| Rice Bread                                                                 | Rice Flour, Potato Starch, Corn Starch | 0.7 | 0.7 | 5 | [16] |
| Baquette                                                                   |                                        | 0.7 | 0.7 | 5 | [10] |
| Shortbread                                                                 |                                        | 0.7 | 0.7 | 5 | [10] |
| Bun                                                                        |                                        | 0.6 | 0.6 | 5 | [10] |
| Multigrain Hot Dog<br>Rolls                                                | Purple Hands Llc                       | 0.6 | 0.6 | 4 | [1]  |
| Bread,                                                                     |                                        | 0.6 | 0.6 | 4 | [20] |
| Crispy & Delicious<br>French Baguettes                                     | Pinnacle Foods Group Llc               | 0.6 | 0.6 | 4 | [1]  |
| Bread, White, Made<br>With Tapioca Starch<br>And Brown Rice Flour          |                                        | 0.5 | 0.5 | 4 | [1]  |
| Bread, Multigrain<br>Made with Real<br>Honey                               | Rudi's Bakery                          | 0.5 | 0.5 | 4 | [18] |
| White Bread Carob<br>Bean Gum                                              |                                        | 0.5 | 0.5 | 4 | [15] |
| Brown Bread Carob<br>Bean Gum                                              |                                        | 0.5 | 0.5 | 4 | [15] |
| Sandwich Bread, Whit                                                       | Nation                                 | 0.5 | 0.5 | 4 | [1]  |
| White Sandwich<br>Bread                                                    | Pinnacle Foods Group Llc               | 0.5 | 0.5 | 3 | [1]  |

|    |                                          |                                                          |      |     |    |      |
|----|------------------------------------------|----------------------------------------------------------|------|-----|----|------|
|    | Bread                                    | Corn, GF Wheat                                           | 0.4  | 0.4 | 3  | [5]  |
|    | Lye Pretzel                              |                                                          | 0.4  | 0.4 | 3  | [10] |
|    | Rustic Bread                             |                                                          | 0.4  | 0.4 | 3  | [10] |
|    | Soft & Hearty Bread<br>Whole Grain Bread | Udi's Gluten Free                                        | 0.2  | 0.2 | 1  | [1]  |
|    | Soft & Delicious White<br>Sandwich       | Udi's Gluten Free                                        | 0.2  | 0.2 | 1  | [1]  |
|    | Brioche Bread                            |                                                          | 0.0  | 0.0 | 0  | [11] |
|    | Sliced White Bread<br>(Sandwich)         |                                                          | 0.0  | 0.0 | 0  | [11] |
|    | Bread Prepared with<br>Olives            |                                                          | 0.0  | 0.0 | 0  | [11] |
|    | White Bread (I, II)                      |                                                          | 0.0  | 0.0 | 0  | [11] |
|    | Bread Prepared with<br>Oil               |                                                          | 0.0  | 0.0 | 0  | [11] |
|    | Ciabatta Bread                           |                                                          | 0.0  | 0.0 | 0  | [11] |
|    | Piadina                                  |                                                          | 0.0  | 0.0 | 0  | [11] |
|    | Melba Toast                              |                                                          |      |     |    |      |
|    | No Data For 5 Products                   |                                                          |      |     |    |      |
| IV | Kellogg Special K<br>Cereal              | Kellogg Company Us, Fortified                            | 18.4 | 5.5 | 39 | [1]  |
|    | Breakfast Cereals,<br>Nesquik            | Nestlé Belgilux S.A.                                     | 11.0 | 3.3 | 24 | [21] |
|    | Oat Musli With Fruits                    | Oat (55%), Fruits (37%), Dates, Raisins, Sunflower Seeds | 9.2  | 2.7 | 20 | [5]  |
|    | Cerelac                                  | Nestlé Belgilux S.A.                                     | 7.5  | 2.3 | 16 | [21] |
|    | Muesli                                   | Muesli Fusion, Inc.                                      | 6.6  | 2.0 | 14 | [1]  |
|    | Amaranth Flakes                          |                                                          | 6.4  | 1.9 | 14 | [3]  |
|    | Amaranth And<br>Quinoa Flakes            |                                                          | 6.3  | 1.9 | 14 | [3]  |
|    | Amaranth Flakes                          |                                                          | 6.1  | 1.8 | 13 | [5]  |
|    | Cherry Walnut<br>Granola Clusters        | Pinnacle Foods Group Llc                                 | 6.0  | 1.8 | 13 | [1]  |
|    | Wild Rice Flakes                         | From Hungary                                             | 5.8  | 1.7 | 12 | [22] |
|    | Instant Oatmeal                          | Glutenfreeda Foods, Inc.                                 | 5.6  | 1.7 | 12 | [18] |

|                                                       |                                                  |     |     |    |      |
|-------------------------------------------------------|--------------------------------------------------|-----|-----|----|------|
| Millet Musli                                          |                                                  | 5.6 | 1.7 | 12 | [15] |
| Freedom Muesli                                        | Surf City Cereal                                 | 5.6 | 1.7 | 12 | [1]  |
| Corn Flakes                                           |                                                  | 5.1 | 1.5 | 11 | [28] |
| Granola                                               | Georgia Peach Products, Inc.                     | 5.1 | 1.5 | 11 | [1]  |
| Oat Flakes                                            |                                                  | 4.9 | 1.5 | 10 | [5]  |
| Musli With Amaranth                                   | Corn, Rice, Amaranth, Millet, Raisins, Raspberry | 4.8 | 1.4 | 10 | [5]  |
| All-Purpose Flour                                     | The King Arthur Flour Company, Inc.              | 4.8 | 1.4 | 10 | [1]  |
| Blueberry Cashew Granola Clusters                     | Pinnacle Foods Group Llc                         | 4.8 | 1.4 | 10 | [1]  |
| Superfood Oatmeal                                     | Nature's Path Organic                            | 4.7 | 1.4 | 10 | [1]  |
| Granola                                               | Garden Of Light Inc.                             | 4.7 | 1.4 | 10 | [1]  |
| Oatmeal, Cinnamon Pumpkin Seed                        | Nature's Path Foods Inc.                         | 4.7 | 1.4 | 10 | [1]  |
| Wild Rice Flakes                                      | From Cambodia                                    | 4.7 | 1.4 | 10 | [22] |
| Wild Rice Flakes                                      | From Greece                                      | 4.7 | 1.4 | 10 | [22] |
| Oats                                                  | Glutenfreeda Foods, Inc.                         | 4.5 | 1.4 | 10 | [1]  |
| Oat Bran                                              | Bob's Red Mill Natural Foods, Inc.               | 4.5 | 1.4 | 10 | [1]  |
| Homestyle Hot Oatmeal                                 | Nature's Path Foods Inc.                         | 4.5 | 1.4 | 10 | [1]  |
| Hot Oatmeal, Brown Sugar Maple with Ancient Grains    |                                                  | 4.5 | 1.4 | 10 | [1]  |
| Muesli, Commercial,                                   |                                                  | 4.2 | 1.3 | 9  | [12] |
| Instant Oatmeal, Natural                              | Glutenfreeda Foods, Inc.                         | 4.2 | 1.3 | 9  | [18] |
| Granola                                               | Oat, Honey, Flax, Sesame, Pumpkin, Sunflower     | 3.9 | 1.2 | 8  | [1]  |
| Organic Superfood Oatmeal                             |                                                  | 3.8 | 1.1 | 8  | [1]  |
| Millet Flakes                                         |                                                  | 3.8 | 1.1 | 8  | [5]  |
| Granola (including Original, Cranberry and Au Naural) | Pinnacle Foods Group Llc                         | 3.6 | 1.1 | 8  | [1]  |
| Quick 1- Minute Oats                                  | The Quaker Oats Company                          | 3.6 | 1.1 | 8  | [1]  |

|                                                                                                        |                                                                |     |     |   |      |
|--------------------------------------------------------------------------------------------------------|----------------------------------------------------------------|-----|-----|---|------|
| 4-Grain Flakes                                                                                         | Oat Flakes, Corn Flakes, Rice Flour, Miller Flour              | 3.5 | 1.1 | 8 | [17] |
| Sorghum Flakes                                                                                         | Variety: Is8237 and Libery                                     | 3.5 | 1.0 | 7 | [23] |
| Wild Rice Flakes                                                                                       | From Canada                                                    | 3.4 | 1.0 | 7 | [22] |
| Instant Oatmeal                                                                                        | The Quaker Oats Company                                        | 3.4 | 1.0 | 7 | [1]  |
| Oatmeal                                                                                                | Bob's Red Mill Natural Foods, Inc.                             | 3.3 | 1.0 | 7 | [1]  |
| Cranberry Nut Crisp Granola                                                                            | Delhaize America, Inc.                                         | 3.2 | 1.0 | 7 | [1]  |
| Instant Oatmeal                                                                                        | The Quaker Oats Company                                        | 3.1 | 0.9 | 7 | [1]  |
| Musli                                                                                                  |                                                                | 3.0 | 0.9 | 6 | [11] |
| GF Wheat Free, Instant Oatmeal, Strawberries                                                           | Glutenfreeda Foods, Inc.                                       | 2.9 | 0.9 | 6 | [18] |
| Sorghum Flakes                                                                                         | Variety: Alpha                                                 | 2.9 | 0.9 | 6 | [23] |
| Oatmeal (including Strawberries & Brown Sugar W/ Flax Oatmeal, Blueberries & Cinnamon W/ Flax Oatmeal) | Glutenfreeda Foods, Inc.                                       | 2.8 | 0.8 | 6 | [18] |
| Oats, Maple Raisin with Flax                                                                           | Glutenfreeda Foods, Inc.                                       | 2.8 | 0.8 | 6 | [18] |
| Granola (including Apple Almond Honey)                                                                 | Glutenfreeda Foods, Inc.                                       | 2.6 | 0.8 | 6 | [1]  |
| Amaranth Musli With Fruits                                                                             | Oat, Amaranth (20%), Fruits (20%), Hazelnut, Sesame, Buckwheat | 2.5 | 0.8 | 5 | [5]  |
| Granola                                                                                                | Garden Of Light Inc.                                           | 2.4 | 0.7 | 5 | [1]  |
| Granola                                                                                                | Garden Of Light Inc.                                           | 2.4 | 0.7 | 5 | [1]  |
| Buckwheat Flakes                                                                                       |                                                                | 2.3 | 0.7 | 5 | [5]  |
| Rolled Oats                                                                                            | Glutenfreeda Foods, Inc.                                       | 2.2 | 0.7 | 5 | [18] |
| Oatmeal                                                                                                | Topco Associates, Inc.                                         | 2.2 | 0.7 | 5 | [1]  |
| Bread Mix                                                                                              | Hodgson Mill                                                   | 2.2 | 0.7 | 5 | [1]  |
| Steel Cut Oats                                                                                         | Glutenfreeda Foods, Inc.                                       | 2.1 | 0.6 | 5 | [18] |
| Old Fashioned Oats Oatmeal                                                                             | Topco Associates, Inc                                          | 2.1 | 0.6 | 4 | [1]  |

|          |                                |                                    |                            |                            |                      |          |
|----------|--------------------------------|------------------------------------|----------------------------|----------------------------|----------------------|----------|
|          | Mixed Berry Instant Oatmeal    | Topco Associates, Inc.             | 1.9                        | 0.6                        | 4                    | [1]      |
|          | Granola (Nuts)                 |                                    | 1.7                        | 0.5                        | 4                    | [10]     |
|          | Granola (Chocolate)            |                                    | 1.5                        | 0.5                        | 4                    | [10]     |
|          | Granola, Cranberry Pecan       | Georgia Peach Products, Inc.       | 1.3                        | 0.4                        | 3                    | [1]      |
|          | Corn Flakes, Wheat Free Cereal | Nature's Path                      | 1.2                        | 0.4                        | 3                    | [1]      |
|          | Cornflakes                     |                                    | 1.2 (0.8–1.5) <sup>1</sup> | 0.4 (0.2–0.5) <sup>1</sup> | 3 (2–4) <sup>1</sup> | [3–7,10] |
|          | Rice Flakes                    |                                    | 0.4                        | 0.1                        | 0                    | [5]      |
|          | No Data For 1 Product          |                                    |                            |                            |                      |          |
| <b>V</b> | Brown Rice & Chestnut Snack    | Brown Rice, Chestnut Flour (60%)   | 9.5                        | 4.7                        | 34                   | [25]     |
|          | Amaranth Groats                |                                    | 8.9                        | 4.5                        | 32                   | [3]      |
|          | Tapioca                        |                                    | 7.8                        | 3.9                        | 28                   | [3]      |
|          | Amaranth                       | Expanded Seeds                     | 7.4                        | 3.7                        | 26                   | [3]      |
|          | Brown Rice & Chestnut Snack    | Brown Rice, Chestnut Flour (40%)   | 6.9                        | 3.4                        | 24                   | [25]     |
|          | Amaranth Popping               |                                    | 5.7                        | 2.9                        | 20                   | [5]      |
|          | Brown Rice & Chestnut Snack    | Brown Rice, Chestnut Flour (20%)   | 5.2                        | 2.6                        | 19                   | [25]     |
|          | Brown Rice Snack               | Brown Rice                         | 5.1                        | 2.6                        | 18                   | [25]     |
|          | Culinary Ancient Grains        | Quinoa Corporation                 | 5.0                        | 2.5                        | 18                   | [1]      |
|          | Millet Groats                  |                                    | 4.8                        | 2.4                        | 17                   | [3]      |
|          | Ancient Quinoa Harvest Quinoa  | Quinoa Corporation                 | 4.8                        | 2.4                        | 17                   | [1]      |
|          | Whole Grain Steel Cut Oats     | Bob's Red Mill Natural Foods, Inc. | 4.6                        | 2.3                        | 16                   | [1]      |
|          | Steel Cut Oats                 | Oat                                | 4.5                        | 2.3                        | 16                   | [1]      |
|          | Old Fashioned Oats             | Country Choice Organic             | 4.5                        | 2.3                        | 16                   | [1]      |
|          | Sorghum                        |                                    | 4.4                        | 2.2                        | 16                   | [3]      |
|          | Happy Quick Oats               | Garden Of Light Inc.               | 4.8                        | 2.4                        | 17                   | [1]      |
|          | Quinoa Groats                  |                                    | 3.7                        | 1.9                        | 13                   | [3]      |



|    |                                         |                                              |                            |                            |                      |           |
|----|-----------------------------------------|----------------------------------------------|----------------------------|----------------------------|----------------------|-----------|
|    | Buckwheat Groats                        |                                              | 2.8                        | 1.4                        | 10                   | [3]       |
|    | Cous-Cous                               |                                              | 2.0                        | 1.0                        | 7                    | [11]      |
|    | Rough Rice                              |                                              | 1.5                        | 0.8                        | 5                    | [24]      |
|    | Brown Rice                              |                                              | 1.3                        | 0.7                        | 5                    | [3]       |
|    | Cous-Cous                               |                                              | 1.1 (0.4-0.2) <sup>1</sup> | 0.6 (0.2-1.0) <sup>1</sup> | 4 (2-7) <sup>1</sup> | [8,10,11] |
|    | Rice Cakes with Quinoa                  | Rice, Quinoa (5%)                            | 0.8                        | 0.4                        | 3                    | [5]       |
|    | Milled Rice                             |                                              | 0.8                        | 0.4                        | 3                    | [24]      |
|    | Rice                                    |                                              | 0.8                        | 0.4                        | 3                    | [3]       |
|    | Corn Couscous                           |                                              | 0.5                        | 0.3                        | 2                    | [28]      |
|    | No Data For 3 Products                  |                                              |                            |                            |                      |           |
| VI | Pasta                                   | Millet-Pomace                                | 42.9                       | 21.5                       | 153                  | [26]      |
|    | Pasta                                   | Corn, Broad Bean (30%)                       | 8.5                        | 4.2                        | 30                   | [29]      |
|    | Pasta With Teff                         | Corn, Teff (31%)                             | 8.0                        | 4.0                        | 29                   | [5]       |
|    | Pasta                                   | Extruded Rice (75%), Amaranth (25%)          | 7.6                        | 3.8                        | 27                   | [27]      |
|    | Pasta                                   | Rice (75%), Amaranth (25%)                   | 7.5                        | 3.8                        | 27                   | [27]      |
|    | Pasta                                   | Extruded Rice (75%), Extruded Amaranth (25%) | 7.5                        | 3.8                        | 27                   | [27]      |
|    | Rice Lasagna                            | The Hain Celestial Group, Inc.               | 6.3                        | 3.2                        | 23                   | [1]       |
|    | Pasta                                   | The Hain Celestial Group, Inc.               | 6.3                        | 3.2                        | 23                   | [1]       |
|    | Pasta                                   | Corn, Quinoa (20%)                           | 5.9                        | 2.9                        | 21                   | [29]      |
|    | Pasta                                   | Corn                                         | 3.9                        | 2.0                        | 14                   | [29]      |
|    | Vermicelli                              |                                              | 3.8                        | 1.9                        | 14                   | [10]      |
|    | Tagliatelli                             |                                              | 3.7                        | 1.8                        | 13                   | [10]      |
|    | Penne                                   |                                              | 3.2                        | 1.6                        | 11                   | [10]      |
|    | Garden Pagodas Organic Supergrain Pasta | Quinoa Corporation                           | 3.2                        | 1.6                        | 11                   | [1]       |
|    | Soya Pasta                              |                                              | 2.7                        | 1.4                        | 10                   | [3]       |
|    | Spaghetti                               |                                              | 2.4                        | 1.2                        | 9                    | [10]      |
|    | Pasta                                   | Brown Rice (87%), Corn (13%)                 | 2.0                        | 1.0                        | 7                    | [13],     |

|                                        |                                    |     |     |   |      |
|----------------------------------------|------------------------------------|-----|-----|---|------|
| Wholemeal Pasta                        |                                    | 2.0 | 1.0 | 7 | [11] |
| Corn Pasta                             |                                    | 2.0 | 1.0 | 7 | [11] |
| Organic Elbows                         | Euro-Usa Trading Co., Inc.         | 1.9 | 0.9 | 7 | [1]  |
| Linguini                               | Euro-Usa Trading Co., Inc.         | 1.9 | 0.9 | 7 | [1]  |
| Fusilli                                |                                    | 1.8 | 0.9 | 6 | [10] |
| Pasta                                  | Extruded Rice                      | 1.7 | 0.9 | 6 | [27] |
| Pasta                                  | Rice                               | 1.6 | 0.8 | 6 | [27] |
| Brown Rice Pasta                       |                                    | 1.5 | 0.7 | 5 | [5]  |
| Pasta                                  | Brown Rice (60%), Corn (40%)       | 1.4 | 0.7 | 5 | [13] |
| Lasagne Sheets                         |                                    | 1.4 | 0.7 | 5 | [10] |
| Pasta, Spaghetti,                      | Semper                             | 1.3 | 0.7 | 5 | [9]  |
| Rice Pasta                             |                                    | 1.0 | 0.5 | 4 | [3]  |
| Pasta Linguine                         |                                    | 1.0 | 0.5 | 4 | [28] |
| Egg Pasta                              |                                    | 1.0 | 0.5 | 4 | [11] |
| Pasta Made with<br>Different Flours    |                                    | 1.0 | 0.5 | 4 | [11] |
| Pasta For Broth                        |                                    | 1.0 | 0.5 | 4 | [11] |
| Pasta with Buckwheat<br>Flour          | Corn, Rice, Buckwheat (15%)        | 0.5 | 3   |   | [5]  |
| Pasta                                  | Schar                              | 0.9 | 0.5 | 3 | [14] |
| Corn Pasta                             |                                    | 0.9 | 0.5 | 3 | [3]  |
| Fresh Fusilli                          | Rp's Fresh Pasta                   | 0.9 | 0.4 | 3 | [1]  |
| Pasta                                  |                                    | 0.9 | 0.4 | 3 | [12] |
| Pasta, Made of Rice<br>And Vegetables, | Orgran Tricolore                   | 0.8 | 0.4 | 3 | [9]  |
| Fresh Linguini                         | Rp's Fresh Pasta                   | 0.7 | 0.4 | 3 | [1]  |
| Organic Pipette –<br>Fancy Elbows      | Dakota Growers Pasta Company, Inc. | 0.7 | 0.4 | 3 | [1]  |
| Spaghetti,                             | George Delallo Co., Inc.           | 0.6 | 0.3 | 2 | [1]  |
| Pasta                                  | The Kroger Co.                     | 0.6 | 0.3 | 2 | [1]  |
| Penne                                  |                                    | 0.6 | 0.3 | 2 | [1]  |

|                                        |                                    |                          |                          |                         |           |
|----------------------------------------|------------------------------------|--------------------------|--------------------------|-------------------------|-----------|
| Elbow Pasta                            | New World Pasta Company            | 0.6                      | 0.3                      | 2                       | [1]       |
| Spaghetti No. 4, Pasta                 | George Delallo Co., Inc.           | 0.6                      | 0.3                      | 2                       | [1]       |
| Elbows Corn & Rice Pasta Blend         | Target Stores                      | 0.6                      | 0.3                      | 2                       | [1]       |
| Corn & Rice Pasta Blend                | American Italian Pasta Company     | 0.6                      | 0.3                      | 2                       | [1]       |
| Multigrain Spaghetti with Quinoa Pasta | Target Stores                      | 0.6                      | 0.3                      | 2                       | [1]       |
| Penne (Corn and Rice) Pasta            |                                    | 0.6                      | 0.3                      | 2                       | [1]       |
| Pasta                                  |                                    | 0.5 (6–143) <sup>1</sup> | 0.3 (6–143) <sup>1</sup> | 1.7 (1–18) <sup>1</sup> | [1,15,28] |
| Pasta Fusilli                          |                                    | 0.5                      | 0.2                      | 2                       | [28]      |
| Pasta D'oro Linguine                   |                                    | 0.5                      | 0.2                      | 2                       | [1]       |
| Organic Rotini                         | Dakota Growers Pasta Company, Inc. | 0.4                      | 0.2                      | 1                       | [1]       |
| Organic Spaghetti                      | Dakota Growers Pasta Company, Inc. | 0.4                      | 0.2                      | 1                       | [1]       |
| Pasta                                  | Corn, Rice                         | 0.4                      | 0.2                      | 1                       | [5]       |
| Rotini Pasta                           | New World Pasta Company            | 0.4                      | 0.2                      | 1                       | [1]       |
| Pasta                                  | New World Pasta Company            | 0.4                      | 0.2                      | 1                       | [1]       |
| Pasta, Made of Corn and Rice           | Barilla                            | 0.3                      | 0.2                      | 1                       | [9]       |
| Buckwheat Pasta                        |                                    | 0.3                      | 0.2                      | 1                       | [3]       |
| Rice Pasta                             |                                    | 0.0                      | 0.0                      | 0                       | [11]      |
| No Data For 6 Products                 |                                    |                          |                          |                         |           |

<sup>1</sup> The average, minimum and maximum content/RNI of mineral in the same product from different references.

**Table S3.** Magnesium in gluten-free I – flours, II – mixes for cooking, III – bakery products, IV – cereals and flakes, V – groats and rice, VI – pasta.

|   | PRODUCT                | PRODUCER/INGREDIENTS/OTHER INFORMATION | MG 100 G                  | MG PORTION              | RNI PORTION             | REFERENCE |
|---|------------------------|----------------------------------------|---------------------------|-------------------------|-------------------------|-----------|
| I | Amaranth Flour Roasted |                                        | 250                       | 75                      | 20                      | [3]       |
|   | Amaranth Flour         |                                        | 206 (84–269) <sup>1</sup> | 62 (25–81) <sup>1</sup> | 17 (7–22) <sup>1</sup>  | [2–5]     |
|   | Quinoa                 |                                        | 170(160–230) <sup>1</sup> | 51 (48–69) <sup>1</sup> | 14 (13–18) <sup>1</sup> | [6–8]     |

|    |                               |                                                      |                            |                         |                         |            |
|----|-------------------------------|------------------------------------------------------|----------------------------|-------------------------|-------------------------|------------|
|    | Teff                          |                                                      | 165 (137–184) <sup>1</sup> | 50 (41–55) <sup>1</sup> | 14 (11–15) <sup>1</sup> | [3,5–7]    |
|    | Brown Rice Flour              |                                                      | 128                        | 38                      | 10                      | [13]       |
|    | Buckwheat                     |                                                      | 128 (2–219) <sup>1</sup>   | 39 (1–66) <sup>1</sup>  | 10 (7–18) <sup>1</sup>  | [3,5–7,30] |
|    | Millet                        |                                                      | 122 (107–167) <sup>1</sup> | 37 (32–49) <sup>1</sup> | 10 (9–13) <sup>1</sup>  | [3,5]      |
|    | Wholemeal Flour               | Rice                                                 | 112                        | 34                      | 9                       | [24]       |
|    | Chickpea                      |                                                      | 103 (20–166) <sup>1</sup>  | 31 (36–50) <sup>1</sup> | 8 (10–13) <sup>1</sup>  | [3,5]      |
|    | Oat                           |                                                      | 86 (39–133) <sup>1</sup>   | 26 (12–40) <sup>1</sup> | 7 (3–11) <sup>1</sup>   | [3,5–7]    |
|    | Sorghum Flour                 |                                                      | 85                         | 25                      | 7                       | [6,7]      |
|    | Chestnut                      |                                                      | 75 (74–76) <sup>1</sup>    | 23 (22–23) <sup>1</sup> | 6 (6) <sup>1</sup>      | [3,5]      |
|    | Flour                         | Jyttemel Original                                    | 68                         | 20                      | 5                       | [9]        |
|    | Acorn Flour                   |                                                      | 54                         | 16                      | 4                       | [5]        |
|    | Corn                          |                                                      | 33 (7–58) <sup>1</sup>     | 10 (2–17) <sup>1</sup>  | 3 (1–5) <sup>1</sup>    | [5–7,13]   |
|    | Rice                          |                                                      | 31 (19–36) <sup>1</sup>    | 10 (6–11) <sup>1</sup>  | 3 (2–3) <sup>1</sup>    | [3,5–7]    |
|    | Flour With 10% Of Oat Flour   | Corn, Potato, Oat                                    | 23                         | 7                       | 2                       | [5]        |
|    | Flour, Mix                    | Rice, Soy, Corn, Tapioca                             | 23                         | 7                       | 2                       | [12]       |
|    | Flour                         | Schär                                                | 16                         | 5                       | 1                       | [9]        |
|    | Flour, Coarse                 | Semper                                               | 14                         | 4                       | 1                       | [9]        |
|    | Rice Starch                   |                                                      | 6                          | 2                       | 0                       | [3]        |
|    | Corn Starch                   |                                                      | 3                          | 1                       | 0                       | [3]        |
|    | Brown Rice Flour              |                                                      | 2                          | 1                       | 0                       | [30]       |
|    | No Data For 21 Products       |                                                      |                            |                         |                         |            |
|    | Multigrain Mix For Bread      | Corn, Rice, Linseed Flour (6%), Sunflower Seeds (6%) | 88                         | 26                      | 7                       | [5]        |
|    | Oat Mix For Bread             | Oat (61%), Potato                                    | 72                         | 22                      | 6                       | [5]        |
|    | Oat Mix for Chocolate Muffins | Oat (20%), Potato, Rice                              | 54                         | 16                      | 4                       | [5]        |
| II | Oat Cookies Mix               | Oat (45%), Rice, Corn                                | 53                         | 16                      | 4                       | [5]        |
|    | Baking Mix Brown              | Glutafin                                             | 52                         | 16                      | 4                       | [14]       |
|    | Muffin Mix                    | Corn, Buckwheat                                      | 46                         | 14                      | 4                       | [5]        |
|    | Baking Mix White              | Glutafin                                             | 12                         | 4                       | 1                       | [14]       |

|                     |                                                                   |                                                                                                                        |     |     |      |      |
|---------------------|-------------------------------------------------------------------|------------------------------------------------------------------------------------------------------------------------|-----|-----|------|------|
|                     | Flour Mix for Bread                                               |                                                                                                                        | 11  | 3   | 1    | [15] |
|                     | Baking Mix White                                                  | Schar                                                                                                                  | 9   | 3   | 1    | [14] |
|                     | Cake Base, Powder                                                 | Toro                                                                                                                   | 9   | 3   | 1    | [9]  |
|                     | Cake Flour Mix                                                    |                                                                                                                        | 8   | 2   | 1    | [15] |
|                     | Bread Mix                                                         | Corn, GF Wheat                                                                                                         | 7   | 2   | 1    | [5]  |
|                     | Cake Mix, Powder, Toro                                            | Toro                                                                                                                   | 7   | 2   | 1    | [9]  |
|                     | Flour Mix                                                         |                                                                                                                        | 4   | 1   | 0    | [15] |
|                     | No Data For 66 Products                                           |                                                                                                                        |     |     |      |      |
| III                 | Crisp Bread, Prepared from Powder                                 | Toro                                                                                                                   | 225 | 225 | 60   | [9]  |
|                     | Seed Crispbread                                                   | Buckwheat Flour, Sunflower Seed, Pumpkin Seed, Sesame Seed, Rapeseed Oil, Linseed, Salt                                | 181 | 181 | 48   | [17] |
|                     | Crispbread                                                        |                                                                                                                        | 153 | 153 | 41   | [15] |
|                     | Bread, Homemade from Basic Ingredients                            |                                                                                                                        | 101 | 101 | 27   | [12] |
|                     | Whole Grain Dinner Rolls                                          | Udi's Gluten Free                                                                                                      | 96  | 96  | 26   | [1]  |
|                     | Rolls, Whole Grain, Made with Tapioca Starch and Brown Rice Flour |                                                                                                                        | 96  | 96  | 26   | [1]  |
|                     | Multigrain Bread                                                  | Corn, GF Wheat with Linseed, Sunflower, Soya, And Pumpkin Seeds                                                        | 76  | 76  | 20   | [5]  |
|                     | Buckwheat Bread With Milk                                         | Buckwheat Flour, Potato Starch, Corn Starch, Milk Powder                                                               | 72  | 72  | 19   | [16] |
|                     | Buckwheat Bread with Milk and Seeds                               | Buckwheat Flour, Potato Starch, Corn Starch, Milk Powder, Seeds (Poppy, Amaranth, Flax, Sunflower, Pumpkin, Hazelnuts) | 71  | 71  | 19   | [16] |
|                     | Bread With Grains                                                 | Corn, GF Wheat with Linseed, And Sunflower Seeds                                                                       | 69  | 69  | 18   | [5]  |
| Bread With Oilseeds |                                                                   | 64                                                                                                                     | 64  | 17  | [15] |      |

|                                                                             |                                                                                                                   |    |    |    |      |
|-----------------------------------------------------------------------------|-------------------------------------------------------------------------------------------------------------------|----|----|----|------|
| Multigrain Bread                                                            | Corn, GF Wheat with Linseed (2.7%), Sunflower (2.7%), And Pumpkin Seeds (2.7%)                                    | 60 | 60 | 16 | [5]  |
| Millet Bread                                                                |                                                                                                                   | 56 | 56 | 15 | [15] |
| Bread, With Added Grains, Commercial                                        |                                                                                                                   | 52 | 52 | 14 | [12] |
| Buckwheat Bread                                                             | Buckwheat Flour, Potato Starch, Corn Starch                                                                       | 49 | 49 | 13 | [16] |
| Omega Flax Bread                                                            | Silver Hills                                                                                                      | 46 | 46 | 12 | [1]  |
| Classic French Dinner Rolls                                                 | Udi's Gluten Free                                                                                                 | 44 | 44 | 12 | [1]  |
| Rolls, White, Made with Brown Rice Flour, Tapioca Starch, And Potato Starch |                                                                                                                   | 44 | 44 | 12 | [1]  |
| Rice Bread with Milk and Seeds                                              | Rice Flour, Potato Starch, Corn Starch, Milk Powder, Seeds (Poppy, Amaranth, Flax, Sunflower, Pumpkin, Hazelnuts) | 43 | 43 | 11 | [16] |
| Wheat-Free, Classic White Bread                                             | Andrea's Gluten Free                                                                                              | 42 | 42 | 11 | [1]  |
| Rolls, White, Made with Brown Rice Flour, Tapioca Starch, And Sorghum Flour |                                                                                                                   | 42 | 42 | 11 | [1]  |
| Bread Crumbs                                                                |                                                                                                                   | 41 | 41 | 11 | [15] |
| Rice Bread With Milk                                                        | Rice Flour, Potato Starch, Corn Starch, Milk Powder                                                               | 38 | 38 | 10 | [16] |
| Brown Bread                                                                 | Rice, Corn, Potato                                                                                                | 35 | 35 | 9  | [5]  |
| Bread Brown                                                                 | Glutafin                                                                                                          | 33 | 33 | 9  | [14] |
| Bread, Whole Grain, Made with Tapioca Starch and Brown Rice Flour           |                                                                                                                   | 31 | 31 | 8  | [1]  |
| Crisp Bread                                                                 | Fette Croccanti                                                                                                   | 30 | 30 | 8  | [14] |

|                                                                     |                                                                                     |    |    |   |      |
|---------------------------------------------------------------------|-------------------------------------------------------------------------------------|----|----|---|------|
| Bread, White, Made With                                             | Tapioca Starch, Brown Rice Flour                                                    | 25 | 25 | 7 | [1]  |
| Bread, Commercial                                                   |                                                                                     | 23 | 23 | 6 | [12] |
| Bread                                                               | GF Wheat, Millet Flour; Corn Starch                                                 | 18 | 18 | 5 | [19] |
| Bread,                                                              |                                                                                     | 18 | 18 | 5 | [20] |
| Bread                                                               | Semper                                                                              | 18 | 18 | 5 | [9]  |
| Bread                                                               | Corn, GF Wheat                                                                      | 15 | 15 | 4 | [5]  |
| Chestnut Bread                                                      |                                                                                     | 14 | 14 | 4 | [15] |
| Original Sandwich Bread                                             | Rudi's Bakery                                                                       | 13 | 13 | 3 | [1]  |
| Classic White Rolls                                                 | Dr. Schar Usa, Inc.                                                                 | 13 | 13 | 3 | [1]  |
| Bread, White, Made with Rice Flour, Corn Starch, and/Or Tapioca     |                                                                                     | 12 | 12 | 3 | [1]  |
| Soft Dinner Roll                                                    | Rudi's Bakery                                                                       | 11 | 11 | 3 | [1]  |
| Bread, White, Made with Potato Extract, Rice Starch, And Rice Flour |                                                                                     | 11 | 11 | 3 | [1]  |
| Rice Bread                                                          | Rice Flour, Potato Starch, Corn Starch                                              | 11 | 11 | 3 | [16] |
| Raisin Bread                                                        |                                                                                     | 11 | 11 | 3 | [15] |
| White Bread                                                         |                                                                                     | 10 | 10 | 3 | [15] |
| Rolls, White, Made with Rice Flour, Rice Starch, And Corn Starch    |                                                                                     | 10 | 10 | 3 | [1]  |
| Bread White                                                         | Glutafin                                                                            | 10 | 10 | 3 | [14] |
| Swiss Roll,                                                         | Egg Without Shell, Sugar, Corn Flour, Potato Starch, Baking Powder, Mixed Berry Jam | 10 | 10 | 3 | [17] |
| Brown Bread with Carob Gum                                          |                                                                                     | 9  | 9  | 2 | [15] |
| White Bread with Carob Gum                                          |                                                                                     | 9  | 9  | 2 | [15] |

|    |                                       |                                                                |     |    |    |      |
|----|---------------------------------------|----------------------------------------------------------------|-----|----|----|------|
|    | Soft & Hearty Whole Grain Bread       | Udi's Gluten Free                                              | 8   | 8  | 2  | [1]  |
|    | Soft & Delicious White Sandwich Bread | Udi's Gluten Free                                              | 7   | 7  | 2  | [1]  |
|    | No Data For 73 Products               |                                                                |     |    |    |      |
| IV | Amaranth Flakes                       |                                                                | 301 | 90 | 24 | [3]  |
|    | Wild Rice Flakes                      | From Hungary                                                   | 300 | 90 | 24 | [22] |
|    | Amaranth And Quinoa Flakes            |                                                                | 282 | 85 | 23 | [3]  |
|    | Wild Rice Flakes                      | From Greece                                                    | 249 | 75 | 20 | [22] |
|    | Amaranth Flakes                       |                                                                | 181 | 54 | 14 | [5]  |
|    | Buckwheat Flakes                      |                                                                | 178 | 53 | 14 | [5]  |
|    | Millet Flakes                         |                                                                | 132 | 40 | 11 | [5]  |
|    | Oat Flakes                            |                                                                | 121 | 36 | 10 | [5]  |
|    | Instant Oatmeal                       | The Quaker Oats Company                                        | 114 | 34 | 9  | [1]  |
|    | Amaranth Musli with Fruits            | Oat, Amaranth (20%), Fruits (20%), Hazelnut, Sesame, Buckwheat | 114 | 34 | 9  | [5]  |
|    | Oat Musli With Fruits                 | Oat (55%), Fruits (37%), Dates, Raisins, Sunflower Seeds       | 111 | 33 | 9  | [5]  |
|    | Muesli, Commercial                    |                                                                | 110 | 33 | 9  | [12] |
|    | Kellogg Special K Cereal              | Kellogg Company Us. Fortified with Fe                          | 109 | 33 | 9  | [1]  |
|    | Wild Rice Flakes                      | From Cambodia                                                  | 101 | 30 | 8  | [22] |
|    | Quick 1- Minute Oats                  | The Quaker Oats Company                                        | 100 | 30 | 8  | [1]  |
|    | Musli With Amaranth                   | Corn, Rice, Amaranth, Millet, Raisins, Raspberry               | 98  | 29 | 8  | [5]  |
|    | 4-Grain Flakes                        | Oat Flakes, Corn Flakes, Rice Flour, Miller Flour              | 98  | 29 | 8  | [17] |
|    | Instant Oatmeal                       | The Quaker Oats Company                                        | 93  | 28 | 7  | [1]  |
|    | Wild Rice Flakes                      | From Canada                                                    | 82  | 25 | 7  | [22] |
|    | Cranberry Nut Crisp Granola           | Delhaize America, Inc.                                         | 71  | 21 | 6  | [1]  |
|    | Rice Flakes                           |                                                                | 32  | 10 | 3  | [5]  |
|    | Corn Flakes                           |                                                                | 6   | 2  | 0  | [3]  |
|    | No Data For 51 Products               |                                                                |     |    |    |      |



|                            |                             |                                  |        |     |     |      |     |
|----------------------------|-----------------------------|----------------------------------|--------|-----|-----|------|-----|
| V                          | Amaranth Groats             |                                  | 313    | 157 | 42  | [3]  |     |
|                            | Amaranth                    | Expanded Seeds                   | 285    | 143 | 38  | [3]  |     |
|                            | Tapioca                     |                                  | 239    | 120 | 32  | [3]  |     |
|                            | Amaranth Popping            |                                  | 223    | 112 | 30  | [5]  |     |
|                            | Buckwheat Groats            |                                  | 218    | 109 | 29  | [3]  |     |
|                            | Sorghum                     |                                  | 162    | 81  | 22  | [3]  |     |
|                            | Rough Rice                  |                                  | 143    | 72  | 19  | [24] |     |
|                            | Quinoa Groats               |                                  | 131    | 66  | 17  | [3]  |     |
|                            | Rice Cakes With Quinoa      | Rice, Quinoa (5%)                | 118    | 59  | 16  | [5]  |     |
|                            | Brown Rice                  |                                  | 110    | 55  | 15  | [3]  |     |
|                            | Millet Groats               |                                  | 100    | 50  | 13  | [3]  |     |
|                            | Milled Rice                 |                                  | 25     | 13  | 3   | [24] |     |
|                            | Rice                        |                                  | 13     | 7   | 2   | [3]  |     |
|                            | Brown Rice Snack            | Brown Rice                       | 12     | 6   | 2   | [25] |     |
|                            | Brown Rice & Chestnut Snack | Brown Rice, Chestnut Flour (40%) | 8      | 4   | 1   | [25] |     |
|                            | Brown Rice & Chestnut Snack | Brown Rice, Chestnut Flour (20%) | 8      | 4   | 1   | [25] |     |
|                            | Brown Rice & Chestnut Snack | Brown Rice, Chestnut Flour (60%) | 5      | 3   | 1   | [25] |     |
|                            | No Data For 13 Products     |                                  |        |     |     |      |     |
|                            | VI                          | Brown Rice Pasta                 |        | 121 | 61  | 16   | [5] |
|                            |                             | Pasta, Spaghetti                 | Semper | 120 | 60  | 16   | [9] |
| Pasta                      |                             | Corn                             | 119    | 60  | 16  | [1]  |     |
| Buckwheat Pasta            |                             | 111                              | 56     | 15  | [3] |      |     |
| Pasta                      |                             | Brown Rice (87%), Corn (13%)     | 107    | 54  | 14  | [13] |     |
| Pasta With Teff            |                             | Corn, Teff (31%)                 | 86     | 43  | 11  | [5]  |     |
| Pasta                      |                             | Brown Rice (60%), Corn (40%)     | 78     | 39  | 10  | [13] |     |
| Pasta With Buckwheat Flour |                             | Corn, Rice, Buckwheat (15%)      | 72     | 36  | 10  | [5]  |     |
| Soya Pasta                 |                             | 65                               | 33     | 9   | [3] |      |     |

|                                    |                  |                       |                      |                      |         |
|------------------------------------|------------------|-----------------------|----------------------|----------------------|---------|
| Pasta, Made of Rice and Vegetables | Orgran Tricolore | 51                    | 26                   | 7                    | [9]     |
| Pasta                              | Schar            | 31                    | 16                   | 4                    | [14]    |
| Pasta                              | Corn, Rice       | 23                    | 12                   | 3                    | [5]     |
| Pasta, Made of Corn and Rice       | Barilla          | 17                    | 9                    | 2                    | [9]     |
| Rice Pasta                         |                  | 14                    | 7                    | 2                    | [3]     |
| Pasta                              |                  | 8 (2-13) <sup>1</sup> | 4 (1-7) <sup>1</sup> | 1 (0-2) <sup>1</sup> | [12,15] |
| No Data For 54 Products            |                  |                       |                      |                      |         |

<sup>1</sup>The average, minimum and maximum content/RNI of mineral in the same product from different references.

**Table S4.** Zinc in gluten-free I – flours, II – mixes for cooking, III – bakery products, IV – cereals and flakes, V – groats and rice, VI – pasta.

|   | PRODUCT          | PRODUCER/INGREDIENTS/OTHER INFORMATION | MG 100 G                   | MG PORTION                 | RNI PORTION            | REFERENCE |
|---|------------------|----------------------------------------|----------------------------|----------------------------|------------------------|-----------|
| I | Amaranth         |                                        | 2.9 (1.8-4.2) <sup>1</sup> | 0.9 (0.5-1.3) <sup>1</sup> | 9 (5-13) <sup>1</sup>  | [2,4,5]   |
|   | Chickpea Flour   |                                        | 2.9                        | 0.9                        | 9                      | [5]       |
|   | Teff             |                                        | 3.6 (2.5-4.2) <sup>1</sup> | 1.0 (0.7-1.2) <sup>1</sup> | 10 (7-12) <sup>1</sup> | [5-7]     |
|   | Quinoa           |                                        | 2.9 (2.4-3.3) <sup>1</sup> | 0.9 (0.7-1.0) <sup>1</sup> | 9 (7-10) <sup>1</sup>  | [6-8]     |
|   | Millet Flour     |                                        | 2.2                        | 0.7                        | 7                      | [5]       |
|   | Buckwheat        |                                        | 2.1 (1.2-3.1) <sup>1</sup> | 0.6 (0.3-0.9) <sup>1</sup> | 6 (3-9) <sup>1</sup>   | [5-7]     |
|   | Oat              |                                        | 2.1 (1.1-3.0) <sup>1</sup> | 0.6 (0.3-1.9) <sup>1</sup> | 3 (3-9) <sup>1</sup>   | [5-7]     |
|   | Brown Rice Flour |                                        | 1.8                        | 0.5                        | 5                      | [13]      |
|   | Flour            | Jyttemel Original                      | 1.5                        | 0.5                        | 5                      | [9]       |
|   | Rice             |                                        | 1.5 (1.1-1.8) <sup>1</sup> | 0.4 (0.3-0.5) <sup>1</sup> | 4 (3-5) <sup>1</sup>   | [5-7,31]  |
|   | Chestnut Flour   |                                        | 1.1                        | 0.3                        | 3                      | [5]       |
|   | Sorghum Flour    |                                        | 1.0                        | 0.3                        | 3                      | [6,7]     |
|   | Flour            |                                        | 1.0                        | 0.3                        | 3                      | [10]      |
|   | Acorn Flour      |                                        | 0.8                        | 0.2                        | 2                      | [5]       |
|   | Corn             |                                        | 0.7 (0.2-1.1) <sup>1</sup> | 0.2 (0.1-0.3) <sup>1</sup> | 2 (1-3) <sup>1</sup>   | [5-7,13]  |

|    |                               |                                                      |     |     |   |      |
|----|-------------------------------|------------------------------------------------------|-----|-----|---|------|
|    | GF Flour with Oat Flour       | Corn, Potato, Oat (10%)                              | 0.6 | 0.2 | 2 | [5]  |
|    | Flour                         | Schär                                                | 0.4 | 0.1 | 1 | [9]  |
|    | Flour, Coarse                 | Semper                                               | 0.4 | 0.1 | 1 | [9]  |
|    | Flour, Mix                    | Rice, Soy, Corn, Tapioca                             | 0.3 | 0.1 | 1 | [12] |
|    | Flour                         |                                                      | 0.1 | 0.0 | 0 | [28] |
|    | Mixed Flours                  |                                                      | 0.0 | 0.0 | 0 | [11] |
|    | No Data For 45 Products       |                                                      |     |     |   |      |
| II | Oat Mix For Bread             | Oat (61%), Potato                                    | 1.9 | 0.6 | 6 | [5]  |
|    | Breadcrumbs                   |                                                      | 1.9 | 0.6 | 6 | [10] |
|    | Bake mix (Pizza)              |                                                      | 1.6 | 0.5 | 5 | [10] |
|    | Oat Cookies Mix               | Oat (45%), Rice, Corn                                | 1.3 | 0.4 | 4 | [5]  |
|    | Oat Mix for Chocolate Muffins | Oat (20%), Potato, Rice                              | 1.1 | 0.3 | 3 | [5]  |
|    | Bake mix white (cake)         |                                                      | 1.1 | 0.3 | 3 | [10] |
|    | Multigrain Mix For Bread      | Corn, Rice, Linseed Flour (6%), Sunflower Seeds (6%) | 1.0 | 0.3 | 3 | [5]  |
|    | Flour Mix For Bread           |                                                      | 1.0 | 0.3 | 3 | [15] |
|    | Cake Flour Mix                |                                                      | 0.9 | 0.3 | 3 | [15] |
|    | Cake Base,                    | Toro                                                 | 0.8 | 0.2 | 2 | [9]  |
|    | Bake mix brown (cake)         |                                                      | 0.8 | 0.2 | 2 | [10] |
|    | Muffin Mix                    | Corn, Buckwheat                                      | 0.5 | 0.1 | 1 | [5]  |
|    | Flour For Cakes               |                                                      | 0.0 | 0.0 | 0 | [28] |
|    | Baking Mix White              | Schar                                                | 0.4 | 0.1 | 1 | [14] |
|    | Cake Mix                      | Toro                                                 | 0.2 | 0.1 | 1 | [9]  |
|    | Bread Mix                     | Corn, GF Wheat                                       | 0.2 | 0.0 | 0 | [5]  |
|    | Baking Mix Brown              | Glutafin                                             | 0.1 | 0.0 | 0 | [14] |
|    | Flour Mix                     |                                                      | 0.0 | 0.0 | 0 | [15] |
|    | Breadcrumbs                   |                                                      | 0.0 | 0.0 | 0 | [11] |
|    | Flour for Cake                |                                                      | 0.0 | 0.0 | 0 | [11] |
|    | Flour for Bread               |                                                      | 0.0 | 0.0 | 0 | [11] |

No Data For 115 Products

III

|                                        |                                                                                                                        |                            |                            |                       |         |
|----------------------------------------|------------------------------------------------------------------------------------------------------------------------|----------------------------|----------------------------|-----------------------|---------|
| Shortbread                             |                                                                                                                        | 8.2                        | 8.2                        | 82                    | [28]    |
| Crisp Bread, Prepared from Powder      | Toro                                                                                                                   | 4.7                        | 4.7                        | 47                    | [9]     |
| Seed Crispbread                        | Buckwheat Flour, Sunflower Seed, Pumpkin Seed, Sesame Seed, Rapeseed Linseed                                           | 3.2                        | 3.2                        | 32                    | [17]    |
| Bread Crumbs                           |                                                                                                                        | 2.2                        | 2.2                        | 22                    | [15]    |
| Buckwheat Bread With Milk              | Buckwheat Flour, Potato Starch, Corn Starch, Milk Powder                                                               | 2.0                        | 2.0                        | 20                    | [16]    |
| Crisp Bread                            |                                                                                                                        | 2.9 (1.8–4.2) <sup>1</sup> | 0.9 (0.5–1.3) <sup>1</sup> | 9 (5–13) <sup>1</sup> | [2,4,5] |
| Wholegrain Bread                       |                                                                                                                        | 1.7                        | 1.7                        | 12                    | [10]    |
| Millet Bread                           |                                                                                                                        | 1.6                        | 1.6                        | 16                    | [15]    |
| Bread, Homemade from Basic Ingredients |                                                                                                                        | 1.6                        | 1.6                        | 16                    | [12]    |
| Whole Grain Dinner Rolls               | Udi's Gluten Free's                                                                                                    | 1.4                        | 1.4                        | 3                     | [1]     |
| Rolls, Whole Grain                     | Tapioca Starch, Brown Rice Flour                                                                                       | 1.4                        | 1.4                        | 3                     | [1]     |
| Bread with oilseeds                    |                                                                                                                        | 1.3                        | 1.3                        | 13                    | [15]    |
| Toast                                  |                                                                                                                        | 1.2                        | 1.2                        | 12                    | [10]    |
| Rice Bread With Milk                   | Rice Flour, Potato Starch, Corn Starch, Milk Powder                                                                    | 1.1                        | 1.1                        | 11                    | [16]    |
| Buckwheat Bread                        | Buckwheat Flour, Potato Starch, Corn Starch                                                                            | 1.1                        | 1.1                        | 11                    | [16]    |
| Buckwheat Bread with Milk And Seeds    | Buckwheat Flour, Potato Starch, Corn Starch, Milk Powder, Seeds (Poppy, Amaranth, Flax, Sunflower, Pumpkin, Hazelnuts) | 1.0                        | 1.0                        | 10                    | [16]    |
| Multigrain Bread                       | Corn, GF Wheat with Linseed, Sunflower, Soya, Pumpkin Seeds                                                            | 1.0                        | 1.0                        | 10                    | [5]     |
| Ciabatta                               |                                                                                                                        | 0.9                        | 0.9                        | 9                     | [10]    |
| Multigrain Bread                       | Corn, GF Wheat with Linseed (2.7%), Sunflower (2.7%), Pumpkin Seeds (2.7%)                                             | 0.9                        | 0.9                        | 9                     | [5]     |
| Bread, With Added Grains, Commercial   |                                                                                                                        | 0.9                        | 0.9                        | 9                     | [12]    |
| Omega Flax Bread                       | Silver Hills                                                                                                           | 0.9                        | 0.9                        | 9                     | [1]     |
| Brown Bread                            | Rice, Corn, Potato                                                                                                     | 0.8                        | 0.8                        | 8                     | [5]     |
| Rice Bread With Milk And Seeds         | Rice Flour, Potato Starch, Corn Starch, Milk Powder, Seeds (Poppy, Amaranth, Flax, Sunflower, Pumpkin, Hazelnuts)      | 0.8                        | 0.8                        | 8                     | [16]    |

|                                 |                                                 |     |     |   |      |
|---------------------------------|-------------------------------------------------|-----|-----|---|------|
| Bread                           | Semper                                          | 0.8 | 0.8 | 8 | [9]  |
| Bread With Grains               | Corn, GF Wheat with Linseed, Sunflower Seeds    | 0.8 | 0.8 | 8 | [5]  |
| Wheat-Free, Classic White Bread | Andrea's Gluten Free                            | 0.8 | 0.8 | 8 | [1]  |
| Rolls, White                    | Brown Rice Flour, Tapioca Starch, Sorghum Flour | 0.8 | 8   | 8 | [1]  |
| Rice Bread                      | Rice Flour, Potato Starch, Corn Starch          | 0.7 | 0.7 | 7 | [16] |
| Classic French Dinner Rolls     | Udi's Gluten Free's Gluten Free                 | 0.7 | 0.7 | 7 | [1]  |
| Rolls, White                    | Brown Rice Flour, Tapioca Starch, Potato Starch | 0.7 | 0.7 | 7 | [1]  |
| Swiss Roll,                     | Corn Flour, Potato Starch                       | 0.7 | 0.7 | 7 | [17] |
| White Bread with Carob Gum      |                                                 | 0.7 | 0.7 | 7 | [15] |
| Brown Bread with Carob Gum      |                                                 | 0.7 | 0.7 | 7 | [15] |
| Raisin Bread                    |                                                 | 0.7 | 0.7 | 7 | [10] |
| Short Bread                     |                                                 | 0.6 | 0.6 | 6 | [10] |
| Lye Pretzel                     |                                                 | 0.6 | 0.6 | 6 | [10] |
| Chestnut Bread                  |                                                 | 0.6 | 0.6 | 6 | [15] |
| Crisp Bread                     | Fette Croccanti                                 | 0.6 | 0.6 | 6 | [14] |
| Bread, Grain                    | Tapioca Starch, Brown Rice Flour                | 0.6 | 0.6 | 6 | [1]  |
| Original Sandwich Bread         | RUdi's Gluten Free's Bakery                     | 0.6 | 0.6 | 6 | [1]  |
| Classic White Rolls             | Dr. Schar Usa, Inc.                             | 0.6 | 0.6 | 6 | [1]  |
| Bread, Commercial               |                                                 | 0.5 | 0.5 | 5 | [12] |
| Bread, White,                   | Tapioca Starch, Brown Rice Flour                | 0.5 | 0.5 | 5 | [1]  |
| Local Bread                     |                                                 | 0.5 | 0.5 | 5 | [28] |
| Bread, White                    | Rice Flour, Corn Starch, Tapioca                | 0.5 | 0.5 | 5 | [1]  |
| Scone                           |                                                 | 0.5 | 0.5 | 5 | [10] |
| Rustic Bread                    |                                                 | 0.5 | 0.5 | 5 | [10] |
| Baquette                        |                                                 | 0.4 | 0.4 | 4 | [10] |

|    |                                       |                                         |      |     |    |      |
|----|---------------------------------------|-----------------------------------------|------|-----|----|------|
|    | Bun                                   |                                         | 0.4  | 0.4 | 4  | [10] |
|    | Rolls,                                | Rice Flour, Corn Starch, Tapioca        | 0.4  | 0.4 | 4  | [1]  |
|    | Bread                                 |                                         | 0.4  | 0.4 | 4  | [20] |
|    | Bread                                 | GF Wheat, Millet Flour; Corn Starch     | 0.4  | 0.4 | 4  | [19] |
|    | Local Bread B.                        |                                         | 0.3  | 0.3 | 3  | [28] |
|    | Bread                                 | Corn, GF Wheat                          | 0.3  | 0.3 | 3  | [5]  |
|    | Soft Dinner Roll                      | RUdi's Gluten Free's Bakery             | 0.3  | 0.3 | 3  | [1]  |
|    | Bread, White                          | Potato Extract, Rice Starch, Rice Flour | 0.3  | 0.3 | 3  | [1]  |
|    | Industrial Bread                      |                                         | 0.2  | 0.2 | 2  | [28] |
|    |                                       |                                         | 0.2  | 0.2 | 2  | [10] |
|    | Soft & Delicious White Sandwich Bread | Udi's Gluten Free's                     | 0.1  | 0.1 | 1  | [1]  |
|    | Soft & Hearty Whole Grain Bread       | Udi's Gluten Free's                     | 0.1  | 0.1 | 1  | [1]  |
|    | Bread Brown                           | Glutafin                                | 0.1  | 0.1 | 1  | [14] |
|    | Raisin Bread                          |                                         | 0.1  | 0.1 | 1  | [15] |
|    | Brioche Bread                         |                                         | 0.0  | 0.0 | 0  | [11] |
|    | Sliced Bread (Sandwich)               |                                         | 0.0  | 0.0 | 0  | [11] |
|    | Bread Prepared With Olives            |                                         | 0.0  | 0.0 | 0  | [11] |
|    | White Bread (I)                       |                                         | 0.0  | 0.0 | 0  | [11] |
|    | Wholemeal Bread                       |                                         | 0.0  | 0.0 | 0  | [11] |
|    | Bread Prepared with Oil               |                                         | 0.0  | 0.0 | 0  | [11] |
|    | Ciabatta Bread                        |                                         | 0.0  | 0.0 | 0  | [11] |
|    | Piadina                               |                                         | 0.0  | 0.0 | 0  | [11] |
|    | White Bread (II)                      |                                         | 0.0  | 0.0 | 0  | [11] |
|    | Melba Toast                           |                                         | 0.0  | 0.0 | 0  | [11] |
|    | No Data For 47 Products               |                                         |      |     |    |      |
| IV | Blueberry Cashew Granola Clusters     |                                         |      |     |    |      |
|    |                                       | Udi's Gluten Free's Gluten Free         | 12.5 | 3.8 | 38 | [1]  |
|    |                                       | From Hungary                            | 4.5  | 1.4 | 3  | [22] |

|   |                            |                                                                |                            |                            |                      |         |
|---|----------------------------|----------------------------------------------------------------|----------------------------|----------------------------|----------------------|---------|
|   | Oat Flakes                 |                                                                | 3.1                        | 0.9                        | 9                    | [5]     |
|   | Wild Rice Flakes           | From Cambodia                                                  | 3.0                        | 0.9                        | 9                    | [22]    |
|   | Wild Rice Flakes           | From Greece                                                    | 2.7                        | 0.8                        | 8                    | [22]    |
|   | 4-Grain Flakes             | Oat Flakes, Corn Flakes, Rice Flour, Miller Flour              | 2.6                        | 0.8                        | 8                    | [17]    |
|   | Millet Flakes              |                                                                | 2.5                        | 0.8                        | 8                    | [5]     |
|   | Cerelac                    | Nestlé Belgilux S.A., Fortified                                | 2.5                        | 0.8                        | 8                    | [21]    |
|   | Amaranth Flakes            |                                                                | 2.4                        | 0.7                        | 7                    | [5]     |
|   | Buckwheat Flakes           |                                                                | 2.4                        | 0.7                        | 7                    | [5]     |
|   | Oat Musli With Fruits      | Oat (55%), Fruits (37%), Dates, Raisins, Sunflower Seeds       | 2.3                        | 0.7                        | 7                    | [5]     |
|   | Sorghum Flakes             | Variety: Liberty                                               | 2.2                        | 0.6                        | 6                    | [23]    |
|   | Wild Rice Flakes           | From Canada                                                    | 2.0                        | 0.6                        | 6                    | [22]    |
|   | Muesli, Commercial         |                                                                | 1.8                        | 0.5                        | 5                    | [12]    |
|   | Amaranth Musli With Fruits | Oat, Amaranth (20%), Fruits (20%), Hazelnut, Sesame, Buckwheat | 1.7                        | 0.5                        | 5                    | [5]     |
|   | Sorghum Flakes             | Variety: IS8237C                                               | 1.6                        | 0.5                        | 5                    | [23]    |
|   | Granola (nuts)             |                                                                | 1.6                        | 0.5                        | 5                    | [10]    |
|   | Sorghum Flakes             | Variety: Alpha                                                 | 1.5                        | 0.4                        | 4                    | [23]    |
|   | Musli With Amaranth        | Corn, Rice, Amaranth, Millet, Raisins, Raspberry               | 1.5                        | 0.4                        | 4                    | [5]     |
|   | Kellogg Special K          | Kellogg Company Us, Fortified with Fe                          | 1.4                        | 0.4                        | 4                    | [1]     |
|   | Rice Flakes                |                                                                | 1.4                        | 0.4                        | 4                    | [5]     |
|   | Millet Musli               |                                                                | 1.4                        | 0.4                        | 4                    | [15]    |
|   | Corn Flakes                |                                                                | 0.9 (0.3–1.5) <sup>1</sup> | 0.3 (0.1–0.4) <sup>1</sup> | 2 (1–2) <sup>1</sup> | [10,28] |
|   | No Data For 88 Products    |                                                                |                            |                            |                      |         |
| V | Amaranth Popping           |                                                                | 3.1                        | 1.5                        | 15                   | [5]     |
|   | Brown Rice                 |                                                                | 2.3                        | 1.1                        | 11                   | [31]    |
|   | Rice Cakes with Quinoa     | Rice, Quinoa (5%)                                              | 1.3                        | 0.7                        | 7                    | [5]     |
|   | White Rice                 |                                                                | 1.3                        | 0.7                        | 7                    | [31]    |
|   | Enriched White Rice        |                                                                | 1.2                        | 0.6                        | 6                    | [31]    |
|   | Granola (Chocolate)        |                                                                | 0.5                        | 0.2                        | 2                    | [10]    |

|    |                                    |                                              |                            |                            |                      |            |
|----|------------------------------------|----------------------------------------------|----------------------------|----------------------------|----------------------|------------|
|    | Cous-cous                          |                                              | 0.5 (0.2-1.0) <sup>1</sup> | 0.3 (0.1-0.5) <sup>1</sup> | 2 (1-4) <sup>1</sup> | [10,11,28] |
|    | Corn Couscous                      |                                              | 0.2                        | 0.1                        | 1                    | [28]       |
|    | Musli                              |                                              | 0.0                        | 0.0                        | 0                    | [11]       |
|    | No Data For 21 Products            |                                              |                            |                            |                      |            |
| VI | Pasta                              | Millet-Pomace                                | 15.8                       | 7.9                        | 79                   | [26]       |
|    | Pasta                              | Extruded Rice (75%), Amaranth (25%)          | 7.3                        | 3.7                        | 37                   | [27]       |
|    | Pasta                              | Extruded Rice (75%), Extruded Amaranth (25%) | 7.2                        | 3.6                        | 36                   | [27]       |
|    | Pasta                              | Rice (75%), Amaranth (25%)                   | 7.1                        | 3.6                        | 36                   | [27]       |
|    | Vermicelli                         |                                              | 3.1                        | 1.5                        | 15                   | [10]       |
|    | Tagliatelli                        |                                              | 3.0                        | 1.5                        | 15                   | [10]       |
|    | Wholemeal Pasta                    |                                              | 3.0                        | 1.5                        | 15                   | [11]       |
|    | Spaghetti                          |                                              | 2.5                        | 1.3                        | 13                   | [10]       |
|    | Fusilli                            |                                              | 1.9                        | 1.0                        | 10                   | [10]       |
|    | Pasta, Spaghetti                   | Semper                                       | 1.9                        | 1.0                        | 10                   | [9]        |
|    | Pasta                              | Corn                                         | 1.8                        | 0.9                        | 9                    | [1]        |
|    | Pasta                              | Corn, Broad Bean (30%)                       | 1.7                        | 0.9                        | 9                    | [29]       |
|    | Brown Rice Pasta                   |                                              | 1.7                        | 0.8                        | 8                    | [5]        |
|    | Pasta                              | Corn, Quinoa (20%)                           | 1.5                        | 0.8                        | 8                    | [29]       |
|    | Pasta, Made of Rice and Vegetables | Orgran Tricolore                             | 1.4                        | 0.7                        | 7                    | [9]        |
|    | Penne                              |                                              | 1.4                        | 0.7                        | 7                    | [10]       |
|    | Lasagne Sheets                     |                                              | 1.3                        | 0.7                        | 7                    | [10]       |
|    | Pasta with Teff                    | Corn, Teff (31%)                             | 1.3                        | 0.7                        | 7                    | [5]        |
|    | Pasta with Buckwheat Flour         | Corn, Rice, Buckwheat (15%                   | 1.3                        | 0.6                        | 6                    | [5]        |
|    | Pasta                              | Brown Rice (87%), Corn (13%)                 | 1.2                        | 0.6                        | 6                    | [13]       |
|    | Egg Pasta                          |                                              | 1.0                        | 0.5                        | 5                    | [11]       |
|    | Pasta made with different Flours   |                                              | 1.0                        | 0.5                        | 5                    | [11]       |
|    | Corn Pasta                         |                                              | 1.0                        | 0.5                        | 5                    | [11]       |



|                              |                              |                            |                            |                      |         |
|------------------------------|------------------------------|----------------------------|----------------------------|----------------------|---------|
| Rice Pasta                   |                              | 1.0                        | 0.5                        | 5                    | [11]    |
| Pasta For Broth              |                              | 1.0                        | 0.5                        | 5                    | [11]    |
| Pasta                        | Brown Rice (60%), Corn (40%) | 0.7                        | 0.4                        | 4                    | [13]    |
| Pasta                        | Rice                         | 0.7                        | 0.4                        | 4                    | [27]    |
| Pasta                        | Extruded Rice                | 0.7                        | 0.4                        | 4                    | [27]    |
| Pasta                        | Corn                         | 0.5                        | 0.3                        | 3                    | [29]    |
| Pasta                        | Schar                        | 0.5                        | 0.3                        | 3                    | [14]    |
| Pasta, Made of Corn and Rice | Barilla                      | 0.4                        | 0.2                        | 2                    | [9]     |
| Pasta                        | Corn, Rice                   | 0.4                        | 0.2                        | 2                    | [5]     |
| Pasta                        |                              | 0.4 (0.1–0.6) <sup>1</sup> | 0.2 (0.1–0.3) <sup>1</sup> | 2 (0–3) <sup>1</sup> | [15,28] |
| Pasta, Plain                 |                              | 0.3                        | 0.2                        | 1                    | [12]    |
| Pasta Fusilli                |                              | 0.3                        | 0.2                        | 1                    | [28]    |
| Pasta Linguine               |                              | 0.3                        | 0.2                        | 1                    | [28]    |
| No data for 56 products      |                              |                            |                            |                      |         |

<sup>1</sup> The average, minimum and maximum content/RNI of mineral in the same product from different references.

## Reference

1. USDA Food Composition Database. Release April 2018. Available online: <https://ndb.nal.usda.gov/ndb/search/list> (accessed between 26 May and 10 October 2018).
2. Kumar, K.V.P.; Dharmaraj, U.; Sakhare, S.D.; Inamdar, A.A. Preparation of protein and mineral rich fraction from grain amaranth and evaluation of its functional characteristics. *J. Cereal Sci.* **2016**, *69*, 358–362, doi:10.1016/j.jcs.2016.05.002.
3. Kunachowicz, H. (ed.). 2015. *Gluten-Free Diet – What to Choose?* 2nd ed.; Wydawnictwo Lekarskie PZWL: Warsaw, Poland, 2015; pp. 99–170; ISBN 978-83-200-4965-7.
4. Sanz-Penella, J.M.; Wronkowska, M.; Soral-Smietana, M.; Haros, M. Effect of whole amaranth flour on bread properties and nutritive value. *LWT-Food Sci. Technol.* **2013**, *50*, 679–685, doi:10.1016/j.lwt.2012.07.031.
5. Rybicka, I.; Gliszczyńska-Świgło, A. Minerals in grain gluten-free products. The content of calcium, potassium, magnesium, sodium, copper, iron, manganese, and zinc. *J. Food Compos. Anal.* **2017**, *59*, 61–67, doi:10.1016/j.jfca.2017.02.006.
6. Hager, A.S.; Czerny, M.; Bez, J.; Zannini, E.; Arendt, E.K. Starch properties, in vitro digestibility and sensory evaluation of fresh egg pasta produced from oat, teff and wheat flour. *J. Cereal Sci.* **2013**, *58*, 156–163, doi:10.1016/j.jcs.2013.03.004.
7. Hager, A.S.; Wolter, A.; Jacob, F.; Zannini, E.; Arendt, E.K. Nutritional properties and ultra-structure of commercial gluten free flours from different botanical sources compared to wheat flours. *J. Cereal Sci.* **2012**, *56*, 239–247, doi:10.1016/j.jcs.2012.06.005.
8. Jan, R.; Saxena, D.C.; Singh, S. Comparative study of raw and germinated Chenopodium (*Chenopodium album*) flour on the basis of thermal, rheological, minerals, fatty acid profile and phytochemicals. *Food Chem.* **2018**, *269*, 173–180, doi:10.1016/j.foodchem.2018.07.003.

9. Norwegian Food Composition Table Matvaretabellen. 2018. Available online: <http://www.matvaretabellen.no/> (accessed between 26 May and 10 October 2018).
10. Missbach, B.; Schwingshackl, L.; Billmann, A.; Mystek, A.; Hickelsberger, M.; Bauer, G.; Konig, J. Gluten-free food database: The nutritional quality and cost of packaged gluten-free foods. *PeerJ* **2017**, 1–18, doi:10.7717/peerj.1337.
11. Mazzeo, T.; Cauzzi, S.; Brighenti, F.; Pellegrini, N. The development of a composition database of gluten-free products. *Public Health Nutr.* **2003**, *18*, 1353–1357, doi:10.1017/S136898003001682.
12. Nutrient Reference Values for Australia and New Zealand. 2018. Available online: <https://www.nrv.gov.au/nutrients-energy-calculation/nutrients-energy-calc-result-153302860> (accessed between 26 May and 10 October 2018).
13. Silva, E.M.M.; Ascheri, J.L.R.; Ascheri, D.P.R. Quality assessment of gluten-free pasta prepared with a brown rice and corn meal blend via thermoplastic extrusion. *LWT-Food Sci. Technol.* **2016**, *68*, 698–706, doi:10.1016/j.lwt.2015.12.067.
14. The Dutch Food Composition Database (NEVO) online version 2016/5.0. 2016. Available online: <https://nevo-online.rivm.nl/> (accessed between 26 May and 10 October 2018).
15. Bundeslebensmittelschlüssel BLS, version 3.02. 2018. Available online: <https://www.blsdb.de/> (accessed between 26 May and 10 October 2018).
16. Regula, J.; Cerba1, A.; Suliburska, J.; Tinkov, A. In Vitro bioavailability of calcium, magnesium, iron, zinc, and copper from gluten-free breads supplemented with natural additives. *Biol. Trace Elem. Res.* **2018**, *182*, 30–36, doi:10.1007/s12011-017-1065-4.
17. Fineli, version 29.06.2018. 2018. Available online: <https://fineli.fi/fineli/en/index?> (accessed between 26 May and 10 October 2018).
18. Nutritionix. 2018. Available online: <https://www.nutritionix.com/> (accessed between 26 May and 10 October 2018).
19. Rizzello, C.G.; Montemurro, M.; Gobetti, M. Characterization of the Bread Made with Durum Wheat Semolina Rendered Gluten Free by Sourdough Biotechnology in Comparison with Commercial Gluten-Free Products. *J. Food Sci.* **2016**, *81*, H2263–H2272, doi:10.1111/1750-3841.13410.
20. NutriData Estonian Food Composition Database, version 8. 2018. Available online [http://tka.nutridata.ee/index.action?request\\_locale=en](http://tka.nutridata.ee/index.action?request_locale=en) (accessed between 26 May and 10 October 2018).
21. Internubel 2018. Available online: <http://www.internubel.be> (accessed between 26 May and 10 October 2018).
22. Sumczynski, D.; Koubová, E.; Šenkárová, L.; Orsavová, J. Rice flakes produced from commercial wild rice: Chemical compositions, vitamin B compounds, mineral and trace element contents and their dietary intake evaluation. *Food Chem.* **2018**, *264*, 386–392, doi:10.1016/j.foodchem.2018.05.061.
23. Wu, G.; Ashton, J.; Simic, A.; Fang, Z.; Johnson, S.K. Mineral availability is modified by tannin and phytate content in sorghum flaked breakfast cereals. *Food Res. Int.* **2018**, *103*, 509–53, doi:10.1016/j.foodres.2017.09.050.
24. Rosell, C.M.; Marco, C. Rice. In *Gluten-Free Cereal Products and Beverages*; Arendt, E.K., Dal Bello, F. Academic Press Elsevier Inc.: Burlington, VT, USA, 2008; pp. 81–100. ISBN 978-0-12-373739-7.
25. Mir, S.A.; Bosco, S.J.D.; Shah, M.A. Technological and nutritional properties of gluten-free snacks based on brown rice and chestnut flour. *J. Saudi Soc. Agric. Sci.* **2017**, doi:10.1016/j.jssas.2017.02.002.
26. Gull, A.; Prasad, K.; Kumar, P. Nutritional, antioxidant, microstructural and pasting properties of functional pasta. *J. Saudi Soc. Agric. Sci.* **2018**, *17*, 37–153, doi:10.1016/j.jssas.2016.03.002.
27. Cabrera-Chávez, F.; Calderón de la Barca, A.M.; Islas-Rubio, A.R.; Marti, A.; Marengo, M.; Pagani, M.; Bonomi, F.; Iametti, S. Molecular rearrangements in extrusion processes for the production of amaranth-enriched, gluten-free rice pasta. *LWT-Food Sci. Technol.* **2012**, *47*, 421–426, doi:10.1016/j.lwt.2012.01.040.
28. Orecchio, S.; Amorello, S.; Raso, M.; Barreca, S.; Lino, C.; Di Gaudio, F. Determination of trace elements in gluten-free food for celiac people by ICP-MS. *Microchem. J.* **2003**, *116*, 163–172, doi:10.1016/j.microc.2003.04.011.

29. Giménez, M.A.; Drago, S.R.; Bassett, M.N.; Lobo, M.O.; Sammán, N.C. Nutritional improvement of corn pasta-like product with broad bean (*Vicia faba*) and quinoa (*Chenopodium quinoa*). *Food Chem.* **2016**, *199*, 150–156, doi:10.1016/j.foodchem.2015.11.065.
30. Markiewicz-Keszycka, M.; Casado-Gavaldá, M.P.; Cama-Moncunilla, X., Cama-Moncunilla, R.; Dixita, Y.; Cullena, P.J.; Sullivana, C. Laser-induced breakdown spectroscopy (LIBS) for rapid analysis of ash, potassium and magnesium in gluten free flours. *Food Chem.* **2018**, *244*, 324–330, doi: 10.1016/j.foodchem.2017.10.063.
31. Punshon, T.; Jackson, B.P. Essential micronutrient and toxic trace element concentrations in gluten containing and gluten-free foods. *Food Chem.* **2018**, *252*, 258–264, doi:10.1016/j.foodchem.2018.01.120.

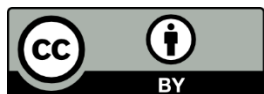

© 2018 by the authors. Submitted for possible open access publication under the terms and conditions of the Creative Commons Attribution (CC BY) license (<http://creativecommons.org/licenses/by/4.0/>).
